# Understanding the emergence of contingent and deterministic exclusion in multispecies communities

Chuliang Song<sup>1,2,3</sup>, Lawrence H. Uricchio<sup>4</sup>, Erin A. Mordecai<sup>5</sup>, Serguei Saavedra<sup>1</sup>

<sup>1</sup>Department of Civil and Environmental Engineering, MIT,  
77 Massachusetts Av., 02139 Cambridge, MA, USA

<sup>2</sup>Department of Biology, McGill University,  
1205 Dr. Penfield Avenue, Montreal, H3A 1B1 Canada

<sup>3</sup> Department of Ecology and Evolutionary Biology, University of Toronto,  
25 Willcocks Street, Toronto, Ontario M5S 3B2 Canada

<sup>4</sup>Department of Integrative Biology, University of California, Berkeley,  
Berkeley, CA, USA

<sup>5</sup>Biology Department, Stanford University, Stanford,  
California 94305 USA

## 1 Abstract

2 Competitive exclusion can be classified as deterministic or as historically contingent. While competi-  
3 tive exclusion is common in nature, it has remained unclear when multispecies communities should be  
4 dominated by deterministic or contingent exclusion. Here, we provide a general theoretical approach  
5 to explain both the emergence and sources of competitive exclusion in multispecies communities.  
6 We illustrate our approach on an empirical competition system between annual and perennial plant  
7 species. First, we find that the life-history of perennial species increases the probability of observing  
8 contingent exclusion by increasing their effective intrinsic growth rates. Second, we find that the  
9 probability of observing contingent exclusion increases with weaker intraspecific competition, and  
10 not with the level of hierarchical competition. Third, we find a shift from contingent exclusion to  
11 dominance with increasing numbers of competing species. Our work provides a heuristic framework  
12 to increase our understanding about the predictability of species persistence within multispecies  
13 communities.

14 **Keywords:** ecological communities, competitive exclusion, contingent exclusion, deterministic ex-  
15 clusion, structural stability

## 16 Introduction

17 Species coexistence is one of the most studied topics in ecology (Vellend, 2016); however, some have  
18 observed that competitive exclusion is the norm rather than the exception in nature (Hardin, 1960;  
19 Goldford *et al.*, 2018; Blowes *et al.*, 2019). Indeed, coexisting species within ecological communities  
20 are usually a fraction of all the species available in a local species pool (Odum *et al.*, 1971; Sigmund,  
21 1995). Exclusion as a ubiquitous feature of ecological communities has been demonstrated empirically  
22 across a wide range of life forms, including algae (Narwani *et al.*, 2013), annual plants (Godoy &  
23 Levine, 2014a), microbiomes (Friedman *et al.*, 2017), bacteria (Tan *et al.*, 2017), and nectar-colonizing  
24 yeasts (Grainger *et al.*, 2019). Importantly, due to the inherent stochasticity in community assembly,  
25 competitive exclusion can be broadly classified into two ecologically different categories (Fukami,  
26 2015; Grainger *et al.*, 2019). One category is *deterministic exclusion* (also known as dominance).  
27 That is, the order of species arrivals does not affect which species is competitively excluded. The  
28 other category is *contingent exclusion* (also known as priority effects). That is, the order of species  
29 arrivals does affect which species is competitively excluded. Knowing whether competitive exclusion is  
30 deterministic or contingent is fundamental to understanding the role of predictability and randomness  
31 in community assembly (Lawton, 1999; Fukami, 2015). For example, it has direct implications for  
32 conservation management: depending on whether the exclusion of native species is deterministic or  
33 contingent, we should adopt different strategies to restore biodiversity resulting after exotic species  
34 invasion (Bøhn *et al.*, 2008; McGeoch *et al.*, 2016).

35 Since the 1930s, theoretical and empirical research has systematically documented and expanded  
36 our understanding of competitive exclusion between two competing species (Gause, 1932; Ayala,  
37 1969; Brown, 1971; Gilpin & Justice, 1972). Moreover, in recent decades, theoretical studies have  
38 started to provide an overarching framework to synthesize data across different competition systems  
39 (Mordecai, 2013; Johnson & Bronstein, 2019; Ke & Wan, 2020). This theoretical development started  
40 by focusing on the conditions leading to deterministic exclusion (Chesson, 2000; Adler *et al.*, 2007),  
41 and then it was extended to investigate the conditions for contingent exclusion (Mordecai, 2011;  
42 Fukami *et al.*, 2016; Ke & Letten, 2018). Similarly, extensive empirical research started to examine  
43 the sources of deterministic exclusion (Mayfield & Levine, 2010; Violle *et al.*, 2011; Adler *et al.*, 2010),  
44 and more recently it has moved to the analysis of contingent exclusion (Grainger *et al.*, 2018, 2019;  
45 Song *et al.*, 2020a). Focusing on competition between two species, this body of work has shown that  
46 deterministic exclusion is more likely to occur when the competitively inferior species has a lower  
47 intrinsic growth rate and when intraspecific interactions are stronger than interspecific interactions.

48 By contrast, greater similarity in species intrinsic growth rates and stronger interspecific relative to  
49 intraspecific interactions promote contingent exclusion (Ke & Letten, 2018; Song *et al.*, 2020a).

50 However, it remains unclear whether these clear conditions at the *two-species* level also operate in  
51 *multispecies* communities. First, the aforementioned body of work has been mainly executed under a  
52 theoretical formalism for two-species communities, which does not have a counterpart for multispecies  
53 communities. Specifically, the standard formalism for two-species communities is incompatible with  
54 the current canonical formalism for multispecies communities (Song *et al.*, 2019). While the for-  
55 malism for two-species communities can easily distinguish competitive exclusion into deterministic  
56 exclusion and contingent exclusion, the formalism for multispecies communities cannot distinguish  
57 them as easily (Barabás *et al.*, 2018). Second, the patterns of contingent and deterministic exclusion  
58 are inherently more complicated in multispecies communities. For example, multispecies communi-  
59 ties may exhibit a mixed outcome of competitive exclusion: some species can be deterministically  
60 excluded while others can be contingently excluded. This implies that we cannot always classify the  
61 competition dynamics of a community simply as either deterministic or contingent in multispecies  
62 communities, which is typically done in two-species communities. Instead, competitive exclusion  
63 in multispecies communities should be analyzed at the species level. Specifically, for a community  
64 with  $S$  interacting species, there are in total  $S!$  possibilities of species arrival orders. We classify  
65 competitive exclusion as follows: if a species is competitively excluded in all possible arrival orders,  
66 then the species is deterministically excluded; if a species is competitively excluded in some but not  
67 all possible arrival orders, then the species is contingently excluded. Thus, we still lack a full un-  
68 derstanding about competitive exclusion in species-rich ecological communities, where more complex  
69 dynamics, including non-hierarchical competition and higher-order interactions, can occur (Levine  
70 *et al.*, 2017; Saavedra *et al.*, 2017).

71 The complexity of competitive exclusion in multispecies communities calls for further developing  
72 the existing theory or establishing new approaches. In this line, the *structural approach* in ecology  
73 has provided an alternative theoretical perspective to study competitive exclusion in multispecies  
74 communities (Saavedra *et al.*, 2017; Song *et al.*, 2018b). In general, the structural approach posits  
75 that how likely a particular outcome of competition is to occur can be understood through the  
76 full range of environmental conditions (contexts) compatible with that qualitative outcome. While  
77 the structural approach was initially devised to investigate species coexistence as the qualitative  
78 outcome (Rohr *et al.*, 2014; Saavedra *et al.*, 2017), it can also be extended to study competitive  
79 exclusion (Song *et al.*, 2020a). Here, we apply the structural approach to investigate the emergence

80 and sources of competitive exclusion in multispecies communities as a function of species' intrinsic  
81 growth rates, community size (number of competing species), and competition structure (i.e., the  
82 interaction matrix).

83 As an empirical application for our framework, we use data on five grass species from California grass-  
84 lands. The invasion of exotic annual species presumably has, together with human-induced habitat  
85 shifts, competitively excluded native perennial species in many regions. This has been considered  
86 as “one of the most dramatic ecological invasions worldwide” (Seabloom *et al.*, 2003). Indeed, em-  
87 pirical evidence suggests that long-term, stable coexistence of multiple annual and perennial species  
88 is unlikely (Uricchio *et al.*, 2019). However, most theoretical (Crawley & May, 1987; Rees & Long,  
89 1992; Kisdi & Geritz, 2003; Uricchio *et al.*, 2019) and experimental studies (Hamilton *et al.*, 1999;  
90 Corbin & D’Antonio, 2004; Seabloom *et al.*, 2003; Mordecai *et al.*, 2015) have primarily focused on  
91 the competitive exclusion between two species (i.e., one annual species and one perennial species).  
92 Thus, it remains unclear how these ecological dynamics are expected to play out among multiple  
93 annual and perennial species. To this end, we apply our investigation to field experiments on three  
94 exotic annual species (*Bromus hordeaceus*, *Bromus diandrus*, and *Avena barbata*) and two native  
95 perennial species (*Elymus glaucus* and *Stipa pulchra*) that occur in California grasslands (Uricchio  
96 *et al.*, 2019). Previous simulation-based work showed a complex pattern of coexistence, determin-  
97 istic exclusion, and contingent exclusion among these species (Uricchio *et al.*, 2019). In addition,  
98 competition among these species is intransitive (non-hierarchical), and stronger between species than  
99 within species (i.e., self-regulation is weak). Here, we integrate a structural approach with numerical  
100 simulations to systemically disentangle the contributions of life-history traits, community size, and  
101 competition structure to deterministic and contingent exclusion in California grasslands.

## 102 **Methods**

### 103 **Structural approach to competitive exclusion**

104 The structural approach in ecology is built on a systematic and probabilistic understanding of how  
105 likely a given type of qualitative dynamics is to occur (Song, 2020; Saavedra *et al.*, 2020). Here, the  
106 qualitative dynamics of interest are deterministic exclusion and contingent exclusion. The structural  
107 approach simplifies ecological dynamics as a function of internal and external conditions (Saavedra  
108 *et al.*, 2017). External conditions are phenomenologically represented by *intrinsic growth rates* (the  
109 maximum growth rate a species can have in isolation) and they are assumed to change in response to

110 environmental conditions. Internal conditions are phenomenologically represented by the *competition*  
111 *structure* (the matrix whose elements correspond to the competitive effect of one species on another)  
112 and are assumed to be fixed across time (see Appendix B for an in-depth discussion). This character-  
113 ization and set of assumptions allows us to calculate the domain of external conditions (the context)  
114 compatible with a given qualitative outcome as a function of a given set of internal conditions. The  
115 larger this domain is, the higher the probability that the observed external conditions match with  
116 one inside the domain, leading to the realization of the corresponding qualitative outcome.

117 Formally, the structural approach uses the *feasibility domain* as the domain of external conditions  
118 compatible with a given qualitative outcome. The feasibility domain describes the full range of intrinsic  
119 growth rates compatible with positive abundances of all species in the community (i.e., feasible  
120 equilibrium). While the competition structure determines the *shape* of the feasibility domain (Song  
121 *et al.*, 2018b, 2020a; Tabi *et al.*, 2020), the observed intrinsic growth rates determine whether the  
122 community is inside or outside of the feasibility domain (Saavedra *et al.*, 2017). When the community  
123 is outside of the feasibility domain, the community is expected to be driven by deterministic exclu-  
124 sion. To further understand the qualitative dynamics when the community is inside the feasibility  
125 domain, we need to consider the *orientation* of the feasibility domain in addition to its shape. The  
126 orientation refers to whether the feasible equilibrium in the feasibility domain is dynamically stable  
127 or not. The importance of the orientation is that stable feasibility leads to coexistence, whereas un-  
128 stable feasibility leads to contingent exclusion (Case, 1999; Fukami *et al.*, 2016). The orientation of  
129 the feasibility domain is mainly driven by the ratio of intra- to interspecific interactions (Song *et al.*,  
130 2020a). In sum, following the structural approach, whether competitive exclusion is deterministic  
131 or contingent should be expected to be mainly driven by the match between the observed intrinsic  
132 growth rates (mainly constrained by life-history processes) with the shape and the orientation of the  
133 feasibility domain (both of which are determined by the observed competition structure). Note that  
134 our framework is only an expectation given that multispecies dynamics is a function of the underlying  
135 complexity of a system (AlAdwani & Saavedra, 2020).

136 By way of example, focusing on two-species communities (see Figure 1 for a graphical illustration), one  
137 can establish three key intuitions about competitive exclusion derived from the structural approach  
138 (Song *et al.*, 2020a): (i) For contingent exclusion to occur, it is necessary that species depress their  
139 competitor's per capita growth rate more than their own (changing the orientation of the feasibility  
140 domain). (ii) The larger the intrinsic growth rate of the competitively inferior species, the more likely  
141 contingent exclusion is to occur. (iii) The larger the feasibility domain, the more likely contingent

142 exclusion is to occur. Note that these intuitions are aligned with the theoretical expectations from  
143 frameworks based on growth rates when rare that are explicitly justified for two-species communities  
144 (Adler *et al.*, 2007; Fukami *et al.*, 2016). We hypothesize these three intuitions operate in multispecies  
145 communities as heuristic rules, which we test in the empirical dataset. It is worth noting that on  
146 average, the size of the feasibility domain decreases with the number of species in a community  
147 (Grilli *et al.*, 2017; Song *et al.*, 2018b). Thus, following these premises, contingent exclusion should  
148 be more likely to occur in ecological communities (i) with fewer number of species, (ii) with species  
149 that more strongly depress their competitor’s growth rate relative to their self-regulation, and (iii)  
150 where life-history processes increase the intrinsic growth rates of competitively inferior species.

## 151 Population dynamics of annual and perennial species

152 To study ecological dynamics under a structural approach, it is necessary to assume the governing  
153 laws of population dynamics (Cenci & Saavedra, 2018). Annual and perennial species have different  
154 population dynamics. A key difference is that annual species only carry over between growing seasons  
155 as seeds, while perennial species carry over between growing seasons as both seeds and adults. To  
156 simplify the notation, for each species  $i$  we hereafter denote annual seeds as  $N_i$ , perennial seeds as  
157  $N_i^S$ , and perennial adults as  $N_i^A$ .

158 Focusing on annual species, we assume the classic seed-banking annual plant model with Beverton-  
159 Holt competition (Levine & HilleRisLambers, 2009; Godoy & Levine, 2014b). For annual plants,  
160 these dynamics can be written as (illustrated in Figure 2A)

$$N_i(t+1) = \underbrace{N_i(t)g_i \frac{\lambda_i}{1 + \sum_j \alpha_{ij} D_j(t)}}_{\text{germinated seeds under competition}} + \underbrace{N_i(t)(1 - g_i)}_{\text{non-germinated seeds}}, \quad (1)$$

161 where  $N_i$  is the number of seeds of species  $i$ ,  $g_i$  is the germination fraction,  $\lambda_i$  is per-capita seed  
162 production in the absence of competition, and  $\alpha_{ij}$  is the per-capita competitive effect of species  $j$   
163 on species  $i$ . The summation of the germinated density  $D_j$  is established over all species of annual  
164 germinants, perennial germinants, and perennial adults. Specifically, the germinated density  $D_j$  of

165 competitors from species  $j$  is

$$D_j = \begin{cases} g_j N_j, & \text{if } j \text{ is annual seed,} \\ g_j N_j^S, & \text{if } j \text{ is perennial seed,} \\ N_j^A, & \text{if } j \text{ is perennial adult.} \end{cases} \quad (2)$$

166 Perennial seed population dynamics can be written as (illustrated in Figure 2B)

$$N_i^S(t+1) = \underbrace{N_i^A(t) \frac{\lambda_i}{1 + \sum_j \alpha_{ij} D_j(t)}}_{\text{seeds produced from adults}} + \underbrace{N_i^S(t)(1 - g_i)}_{\text{non-germinated seeds}}, \quad (3)$$

167 which is a slight modification of the annual plant model. Specifically, perennial seeds are generated  
 168 when adults  $A_i$  reproduce, and reduced by both species competition (first term in Eqn. 3) and the  
 169 survival of non-germinating perennial seeds (second term in Eqn. 3). The competition coefficients  
 170  $\alpha_{ij}$  and densities  $D_j$  are defined as above (Eqn. 2).

171 Finally, the population dynamics of perennial adults can be written as (illustrated in Figure 2B)

$$N_i^A(t+1) = \underbrace{N_i^A(t)\omega_i}_{\text{surviving adults}} + \underbrace{N_i^S(t) \frac{g_i v_i}{1 + \sum_j \beta_{ij} D_j(t)}}_{\text{seeds germinating into adults}}, \quad (4)$$

172 where  $\omega_i$  is the over-summer survival fraction of perennial adults, and  $v_i$  is the fraction of over-  
 173 summer maturation from perennial seedlings into adults for the following year (in the absence of  
 174 competition). Note that perennial adults are generated by both surviving perennial adults  $A_i$  (first  
 175 term in Eqn. 4) and seeds  $S_i$  that germinate and survive over the summer to become adults. Again,  
 176 the abundance of perennial adults are reduced by species competition (second term in Eqn. 4).

## 177 Empirical data and patterns of competitive exclusion

178 We based our analysis on an experimental study conducted in 2015-2016 in Jasper Ridge Biological  
 179 Preserve, located in San Mateo County, California (37°24'N, 122°13'30"W; 66–207 m) (Uricchio  
 180 *et al.*, 2019). The experimental study investigated five focal grassland species with three exotic  
 181 annual species (*Avena barbata*, *Bromus diandrus*, and *Bromus hordeaceus*) and two native perennial  
 182 species (*Stipa pulchra* and *Elymus glaucus*). These species were studied because they were abundant  
 183 and widespread in California grasslands. This experimental study measured key demographic rates



184 that determined species growth, including seed overwinter survival, germination, establishment, adult  
185 bunchgrass survival, and the effects of competition on per-capita seed production (Uricchio *et al.*,  
186 2019). In addition, the study measured competition experimentally and observationally in  $1\text{-}m^2$   
187 plots. This covered a broad range of naturally occurring plant densities. Competition and growth  
188 parameters were sampled via Markov-Chain Monte Carlo based on population dynamics models  
189 developed for the three annual and two perennial grass species. We used 2000 samples from the joint  
190 posterior distribution of these parameters to conduct our study.

191 Given the timescale of competitive exclusion in natural grassland communities, the empirical study  
192 did not perform experiments on competitive exclusion. Thus, we employ the experimentally-parameterized  
193 population dynamics of annual and perennial species to simulate the patterns of competitive exclu-  
194 sion. Specifically, for a community with  $S$  interacting species, we simulate all  $S!$  possible species  
195 arrival orders. Each species arrives into the community when the community has already reached its  
196 stationary state, and we focus on the final stationary state. Using the final stationary states across  
197 all arrival orders we can classify a species as either contingently excluded (excluded in some arrival  
198 orders), deterministically excluded (excluded in all arrival orders), or persistent (not excluded in any  
199 arrival orders). Importantly, note that the classification of species is based solely on the dynamical  
200 outcomes derived from numerical simulations, which is not directly related to whether the community  
201 is feasible or dynamically stable (AlAdwani & Saavedra, 2020). This also prevents a tautological link  
202 between the classification scheme and the structural approach.

## 203 **Understanding the sources of competitive exclusion**

204 To understand the emergence of deterministic and contingent exclusion, it is necessary to understand  
205 their sources. For this purpose, here we focus on three key ecological properties: life-history processes,  
206 community size, and competition structure. Following a structural approach, we investigate these  
207 three sources in the California grassland study system.

### 208 *Life-history processes*

209 Annual and perennial species differ in their strategies for persisting between growing seasons, either  
210 solely as seeds or additionally as surviving adults (Lundgren & Des Marais, 2020)—as we have  
211 exemplified in our population dynamics models. To understand the contribution of this life-history  
212 difference to the emergence of competitive exclusion, we applied the structural approach to the  
213 population dynamics of species with and without modeling the life-history difference between annual

214 and perennial species.

215 By removing over-summer survival of adult perennials and assuming that germinating seeds produce  
 216 new seeds within the same growing season, thereby removing the life-history difference between  
 217 annual and perennial species (i.e., removing the dashed links in Figure 2B), the feasibility condition  
 218 of a multispecies community reduces to

$$\begin{cases} \lambda_i - 1 = \sum_{j \in \mathcal{A}} \alpha_{ij} g_j N_j^* + \sum_{j \in \mathcal{P}} \alpha_{ij} g_j N_j^{S*}, & \forall i \\ N_i^* > 0, & \forall i, \end{cases} \quad (5)$$

219 where  $N_j^*$  represents either the annual or the perennial species,  $\mathcal{A}$  represents the set of all annual  
 220 species, and  $\mathcal{P}$  represents the set of all perennial species.

221 Alternatively, incorporating the life-history processes of perennial species (i.e., keeping the dashed  
 222 links in Figure 2B), the feasibility condition is

$$\begin{cases} \lambda_i - 1 = \sum_{j \in \mathcal{A}} \alpha_{ij} g_j N_j^* + \sum_{j \in \mathcal{P}} \alpha_{ij} g_j \left(1 + \sqrt{\frac{v_j}{\lambda_j(1-\omega_j)}}\right) N_j^{S*}, & \text{if species } i \text{ is annual} \\ \sqrt{\frac{\lambda_i v_i}{1-\omega_i}} - 1 = \sum_{j \in \mathcal{A}} \alpha_{ij} g_j N_j^* + \sum_{j \in \mathcal{P}} \alpha_{ij} g_j \left(1 + \sqrt{\frac{v_j}{\lambda_j(1-\omega_j)}}\right) N_j^{S*}, & \text{if species } i \text{ is perennial} \\ N_i^* > 0, & \forall i, \end{cases} \quad (6)$$

223 where again  $N_j^*$  represents either the annual or the perennial species,  $\mathcal{A}$  represents the set of all  
 224 annual species, and  $\mathcal{P}$  represents the set of all perennial species. The derivations can be found in  
 225 Appendix C.

226 Importantly, the feasibility domain of the multispecies communities is the same excluding (Eqn. 5)  
 227 or including (Eqn. 6) perennial life-history processes. The mathematical rationale of this identity  
 228 comes from the column scaling invariance of the feasibility domain (Song *et al.*, 2020b) (Appendix E).  
 229 The ecological rationale can be interpreted by the fact that perennial life-history processes affect only  
 230 the absolute equilibrium abundances, and not the competition coefficients (Saavedra *et al.*, 2017).  
 231 Thus, for the assumed population dynamics, the feasibility domain of the multispecies community  
 232 is uniquely determined by the competition structure  $\{a_{ij}\}$  summarized in the interaction matrix,  
 233 but not by any other parameter. This result additionally implies that life-history processes only  
 234 affect the patterns of competitive exclusion (whether it is dominated by deterministic or contingent  
 235 exclusion) by changing the effective intrinsic growth rates. Specifically, life-history processes change  
 236 the effective intrinsic growth rates of the perennial species from  $(\lambda_i - 1)$  to  $(\sqrt{\frac{\lambda_i v_i}{1-\omega_i}} - 1)$  (see Appendix

237 C for variations of assumptions).

238 We test the effects of life history differences on competitive exclusion in the species present in our  
239 empirically parameterized California grassland system. As we show theoretically, the effects can  
240 only come through the effective intrinsic growth rates. It is unclear *a priori* whether the life-history  
241 processes increase or decrease the effective intrinsic growth rates of the perennial species empirically.

#### 242 *Community size*

243 As described above, following a structural approach, deterministic exclusion is expected to dominate  
244 over contingent exclusion in species-rich communities (see section *Structural approach on competitive*  
245 *exclusion*, Figure 1). In order to investigate the contribution of community size to the patterns  
246 of competitive exclusion, we need to analyze how the probabilities of observing deterministic and  
247 contingent exclusion for each species change as a function of community size. Importantly, while the  
248 theory suggests that we should get more deterministic exclusion as community size increases, it is  
249 possible that the observed parameters from empirical communities do not support this pattern. Here  
250 we test whether these theoretical patterns hold in the California grassland system.

#### 251 *Competition structure*

252 Ecological communities are characterized by non-random competition structures (Thébault & Fontaine,  
253 2010; Song *et al.*, 2018a; Song & Saavedra, 2020). Indeed, Figure 5A shows the inferred competi-  
254 tion structure (the direction and strength of species competition) of annual and perennial species  
255 in the California grassland system. This figure reveals two key features of the empirically studied  
256 competition structure. First, the intraspecific competition (self-regulation) is generally weaker than  
257 the interspecific competition. Second, interspecific competition forms an intransitive structure (also  
258 known as a non-hierarchical structure). The importance of these two features has been a central ques-  
259 tion in ecological research (Soliveres *et al.*, 2015; Gallien *et al.*, 2017; Barabás *et al.*, 2017; Kinlock,  
260 2019).

261 To test the overall effect of the competition structure on the patterns of competitive exclusion, we  
262 investigate how the competition structure changes the size of the feasibility domain in the empirical  
263 parameter space estimated for California grassland species. Recall that it is expected that contin-  
264 gent exclusion dominates multispecies communities with larger feasibility domains. We compute  
265 numerically the size of the feasibility domain from Eqn. (6) (Song *et al.*, 2018b). Additionally,  
266 to separate the specific contributions of the two structural features of competition (i.e., intraspe-

267 cific competition and intransitive competition), we use model-generated communities with four types  
268 of competition structures: (i) communities with either weak (intraspecific < interspecific) or strong  
269 (intraspecific > interspecific) intraspecific competition, and (ii) communities with either a hierarchi-  
270 cal or intransitive competition structure. Focusing on the first structural combination, we consider  
271 strong intraspecific competition when the intraspecific competition of a given species is larger than  
272 the sum of the interspecific competition that this species experiences from other species (the op-  
273 posite for weak intraspecific competition). Focusing on the second structural combination, we first  
274 generate a Erdős-Rényi structure as an instrumental initiation where each competition strength is in-  
275 dependently sampled from a uniform distribution  $[0, 1]$  (Song & Saavedra, 2018), and then we arrange  
276 the competition structure as either hierarchical or intransitive. We investigate which combinations  
277 can reproduce the associations between competitive exclusion and feasibility domain observed in the  
278 empirical data. We have tested other parameterizations to evaluate the robustness (Appendix F).

## 279 Results

280 We first analyzed the effects of perennial life-history processes on whether a community is domi-  
281 nated by deterministic or contingent exclusion. The structural approach postulates that contingent  
282 exclusion is more likely when competitively inferior species have higher intrinsic growth rates (Figure  
283 1). Theoretically, perennial life-history processes only regulate the intrinsic growth rates—via their  
284 effects on survival and fecundity in the absence of competition—but not the feasibility domain, which  
285 exclusively depends on competition structure. Because the perennial species included in this study  
286 were generally competitively inferior to the annual species, we expected that incorporating perennial  
287 life-history processes would yield a higher frequency of contingent exclusion by increasing perennial  
288 species intrinsic growth rates.

289 Focusing on all possible two-species communities with one annual and one perennial species, Figure 3  
290 confirms the expectation that perennial life-history processes promote contingent exclusion. To illus-  
291 trate this effect, we used a standard graphical representation of ecological dynamics for two species:  
292 the niche-overlap-fitness-ratio space (Adler *et al.*, 2007; Chesson & Kuang, 2008). Specifically, Figure  
293 3 shows that by adding perennial life-history processes to the model, the species average fitness of  
294 perennial species increases, which leads to a higher frequency of contingent exclusion, rather than  
295 deterministic exclusion. In addition, we found that incorporating life-history processes can change  
296 the outcome of the dynamics when subject to different types of environmental perturbations acting

297 on parameters (Song *et al.*, 2020a). That is, we found that communities exhibit robustness to pertur-  
298 bations acting on intrinsic growth rates but not on competition strength when perennial life-history  
299 is excluded, while they exhibit robustness to perturbations acting on competition strength but not  
300 on intrinsic growth rates when perennial life-history is incorporated (see Appendix D). Importantly,  
301 multispecies communities exhibit qualitatively identical patterns (see Figure 4).

302 Next, we analyzed the effects of community size on the patterns of competitive exclusion. The  
303 structural approach argues that contingent exclusion is less likely—and deterministic exclusion more  
304 likely—when the community size is larger (Figure 1). Figure 4 confirms this expectation in the em-  
305 pirical data. We found that the percentage of deterministically excluded species rises from 23% in  
306 two-species communities to 85% in five-species communities. By contrast, the percentage of contin-  
307 gently excluded species falls from 31% in two-species communities to 9% in five-species communities.  
308 Note that we are studying the patterns of competitive exclusion on a species level here (i.e., whether a  
309 species persists, is deterministically excluded, or is contingently excluded). In addition, we found that  
310 the effect of community size acts more strongly on annual than perennial species (Appendix F). The  
311 effect of community size remained consistent with and without incorporating perennial life-history  
312 processes (Appendix F).

313 Lastly, we analyzed the effect of competition structure on the patterns of competitive exclusion. The  
314 empirical competition structure (Figure 5A) exhibits two key features: relatively weak intraspecific  
315 competition, and intransitive competition. The structural approach establishes that contingent ex-  
316 clusion is more likely when a community has a larger feasibility domain. Figure 5B confirms this  
317 expectation in our empirical system: under contingent exclusion, communities have larger feasibility  
318 domains (right orange histograms) than the ones generated under deterministic exclusion (left green  
319 histograms). Note that the size of feasibility domain decreases as a function of community size,  
320 and coexistence (middle blue histograms) is only observed in two-species communities (Fig. 5B).  
321 Additionally, we found theoretically (using simulations, as detailed in Methods) that the empirical  
322 relationship between competitive exclusion and the size of the feasibility domain emerges by gener-  
323 ating weak intraspecific competition structures, regardless of being intransitive or hierarchical (Fig.  
324 5C). These results are robust to different parameterizations in simulations (Appendix G).

## 325 Discussion

326 Despite the recent research focus on understanding the mechanisms underlying stable coexistence  
327 (Levine & HilleRisLambers, 2009; Adler *et al.*, 2007; Chesson, 2000; Godoy *et al.*, 2014; Kraft *et al.*,  
328 2015), competitive exclusion occurs frequently in nature, and the drivers of deterministic versus  
329 contingent exclusion remain poorly understood in multispecies communities (Fukami, 2015; Fukami  
330 *et al.*, 2016; Uricchio *et al.*, 2019; Mordecai *et al.*, 2015; Mordecai, 2013). Indeed, in multispecies  
331 communities, complex outcomes that combine deterministic and contingent exclusion among groups  
332 of species are possible, challenging the extension of results from two-species communities (Case, 1995;  
333 Uricchio *et al.*, 2019). Here, we provide a theoretical framework following a structural approach to  
334 understand the emergence and sources of competitive exclusion in multispecies communities, specifi-  
335 cally to distinguish when competitive exclusion is dominated by deterministic or contingent exclusion.  
336 We have evaluated three key expectations in multispecies communities derived from our theoretical  
337 framework: (i) For contingent exclusion to occur, it is necessary that species have a greater negative  
338 effect on their competitor's per capita growth rate than on their own self-regulation. (ii) The larger  
339 the intrinsic growth rates of competitively inferior species, the more likely that contingent exclusion  
340 occurs. (iii) The larger the feasibility domain of a community, the more likely that contingent exclu-  
341 sion can be observed. We tested these expectations in an empirical study system composed of five  
342 annual and perennial grasses occurring in California grasslands, which exhibit both deterministic and  
343 contingent exclusion and several biologically interesting features, including variation in life history  
344 strategy, weak self-regulation and strong interspecific competition, and intransitive (non-hierarchical)  
345 competition (Uricchio *et al.*, 2019). Specifically, we investigated the impact of perennial life-history  
346 processes, community size, and competition structure dictate the dynamics of competitive exclusion  
347 in this system using the structural approach, which applies to communities larger than two species.

348 First, we found that perennial life history (interannual survival and reproduction of adult bunch-  
349 grasses) increases the probability of observing contingent exclusion by increasing perennial species'  
350 effective intrinsic growth rates (Figures 3 and 4). These life-history processes contribute only to  
351 the effective intrinsic growth rates but not to the effective competition strength. In a two-species  
352 community, perennial life-history processes increase the fitness of competitively inferior species, mak-  
353 ing deterministic exclusion less likely (Figure 3). In multispecies communities, we have shown that  
354 these life-history processes also help the competitively inferior species (Figure 4). This reveals the  
355 importance of life-history processes for increasing the chance of survival of inferior competitors.

356 Second, we have shown that the probability of observing contingent exclusion decreases with com-  
357 munity size (Figure 4). This result is contrary to the naive expectation that contingent exclusion  
358 dominates in larger communities, derived from randomly constructed communities (Zhao *et al.*,  
359 2020). However, it has remained unclear what happens when communities are structured following  
360 a strong deterministic component of population dynamics (Fukami, 2015). For example, in our focal  
361 system, annual species are generally superior competitors to perennial species. Under this scenario,  
362 contrary to the naive expectation, we should expect to see deterministic exclusion dominating larger  
363 communities. That is, a larger community is more likely to contain at least one species that has a  
364 large enough competitive advantage over the others to deterministically exclude them. This appar-  
365 ently contradictory expectation aligns well with the intuition derived from our structural approach  
366 (Figure 1). Further, these findings reveal that multispecies dynamics may be more predictable than  
367 previously thought (May, 1972).

368 Third, we found that the probability of observing contingent exclusion increases as a function of the  
369 size of the feasibility domain defined by the ratio between intraspecific and interspecific competition,  
370 and not by the level of hierarchical competition (Figure 5). While many empirical studies have shown  
371 that intraspecific competition tends to be stronger than interspecific competition (LaManna *et al.*,  
372 2017; Adler *et al.*, 2018), recent work has questioned the generality of the empirical evidence sup-  
373 porting stronger intraspecific competition (Hülsmann & Hartig, 2018; Chisholm & Fung, 2018; Detto  
374 *et al.*, 2019; Broekman *et al.*, 2019). Moreover, we have shown that intransitive (or non-hierarchical)  
375 competition is unlikely to explain the outcomes of competitive exclusion in the studied system. By  
376 contrast, intransitive competition can play an important role in shaping species coexistence (Allesina  
377 & Levine, 2011; Soliveres *et al.*, 2015; Gallien *et al.*, 2017). Thus, our findings imply that ecological  
378 mechanisms may play different roles in coexistence and competitive exclusion.

379 In light of an increasing rate of species invasions as a result of global anthropogenic changes in climate  
380 and land use, ecological systems are in dire need of sustainable strategies to mitigate threats to native  
381 species. Our study system of grassland plants is an ecologically important and widespread ecosystem  
382 that faces such a challenge (Myers *et al.*, 2000). It has been suggested that exotic annual grasses have  
383 the potential to replace native perennial grasses in over 9 million hectares of California grasslands  
384 (Seabloom *et al.*, 2003). Indeed, in our study site located in Jasper Ridge Biological Preserve, while  
385 these grasses often co-occur at the spatial scale of within  $\sim 100\text{m}$  of each other, there are many  
386 patches where these grasses do not co-occur within  $\sim 10\text{m}$ . However, given the long time scales for  
387 exclusion to fully play out, we cannot say for certain that competitive exclusion would dominate in

388 the system. That is, besides the possibility of competitive exclusion, there are two other possibilities:  
389 The first possibility is that a patchwork of different environmental conditions favors different species.  
390 For example, we have observed exotic annuals in more disturbed habitats (e.g., *Elymus glaucus* in  
391 the zones around oak trees), while native perennials in less disturbed habitats (e.g., *Stipa pulchra* in  
392 more open grasslands with lower disturbance). The second possibility is that a patchwork of local  
393 contingent exclusion dynamics have played out such that species are maintained in local patches  
394 that are not truly stably coexisting with other species. Regardless of the specific explanation, this  
395 pressing challenge has underscored the need for systematic restoration efforts (Gea-Izquierdo *et al.*,  
396 2007; Seabloom, 2011; Werner *et al.*, 2016). Our study has shown that the approach to restoration  
397 should be different depending on the richness of the system. According to our findings, systems with  
398 few species can be strongly driven by contingent exclusion, implying that the restoration can be  
399 achieved by focusing on regulating factors, such as life-history traits, self-regulation, or population  
400 abundances. By contrast, species-rich systems can be strongly driven by deterministic exclusion,  
401 implying that the restoration can be achieved by focusing on limiting factors, such as availability  
402 of resources. This result, of course, needs to be taken with caution as we have not used spatial-  
403 temporal variation in our analysis (it is empirically challenging to measure local-scale variation in  
404 model parameters). This, however, can open a new perspective to restoration management since our  
405 key results are testable and generalizable to a wide range of study systems using the same study  
406 designs that investigate species coexistence (Levine & HilleRisLambers, 2009; Godoy *et al.*, 2014;  
407 Adler *et al.*, 2018).

408 Although the understanding of species coexistence has been one of the major topics in ecology for  
409 decades (May, 1972; McCann, 2000; Meszéna *et al.*, 2006; Ives & Carpenter, 2007; Bastolla *et al.*,  
410 2009; Allesina & Tang, 2012; Rohr *et al.*, 2014; Barabás *et al.*, 2014), competitive exclusion remains  
411 the dominant—if hidden—foundation of ecological community structure. While species coexistence  
412 and competitive exclusion go hand-in-hand, our understanding about coexistence is much better than  
413 exclusion. Competitive exclusion is fundamentally different in two ways: deterministic and contin-  
414 gent. To understand the role of historical contingency in ecological communities, it is paramount to  
415 uncover the frequency of and mechanisms underlying deterministic versus contingent exclusion. In  
416 this direction, we have taken a new heuristic perspective that partitions exclusion into these two cate-  
417 gories within multispecies communities. We hope this work can motivate future research looking into  
418 the rich and potentially predictable dynamics of competitive exclusion in multispecies communities.

419 **Authors' contributions:** All authors conceived the ideas and designed the methodology. C.S.



420 performed the study. S.S. supervised the study. C.S. and S.S. wrote a first version of the manuscript.

421 All authors contributed with substantial revisions. E. M. and L. U. compiled and provided data.

422 **Data availability:** The data of the California grassland community have previously been archived  
423 on <https://www.journals.uchicago.edu/doi/abs/10.1086/701434>. The code supporting our analysis  
424 is archived on Github [https://github.com/clsong/competitive\\_exclusion](https://github.com/clsong/competitive_exclusion).

425 **Acknowledgement:** We thank Mohammad AlAdwani, David L. Des Marais, Lucas P. Medeiros,  
426 Caio Guilherme Pereira, and Pengjuan Zu for insightful discussions that led to the improvement of  
427 this work.

## 428 References

- 429 Adler, P. B., Ellner, S. P. & Levine, J. M. (2010). Coexistence of perennial plants: an embarrassment  
430 of niches. *Ecology Letters*, 13, 1019–1029.
- 431 Adler, P. B., HilleRisLambers, J. & Levine, J. M. (2007). A niche for neutrality. *Ecology Letters*, 10,  
432 95–104.
- 433 Adler, P. B., Smull, D., Beard, K. H., Choi, R. T., Furniss, T., Kulmatiski, A., Meiners, J. M.,  
434 Tredennick, A. T. & Veblen, K. E. (2018). Competition and coexistence in plant communities:  
435 intraspecific competition is stronger than interspecific competition. *Ecology Letters*, 21, 1319–1329.
- 436 AlAdwani, M. & Saavedra, S. (2020). Ecological models: higher complexity in, higher feasibility out.  
437 *J. of the Roy. Soc. Interface*, 17, 20200607.
- 438 Allesina, S. & Levine, J. M. (2011). A competitive network theory of species diversity. *Proceedings*  
439 *of the National Academy of Sciences*, 108, 5638–5642.
- 440 Allesina, S. & Tang, S. (2012). Stability criteria for complex ecosystems. *Nature*, 483, 205–208.
- 441 Ayala, F. J. (1969). Experimental invalidation of the principle of competitive exclusion. *Nature*, 224,  
442 1076–1079.
- 443 Barabás, G., D’Andrea, R. & Stump, S. M. (2018). Chesson’s coexistence theory. *Ecological Mono-*  
444 *graphs*, 88, 277–303.
- 445 Barabás, G., Michalska-Smith, M. J. & Allesina, S. (2017). Self-regulation and the stability of large  
446 ecological networks. *Nature Ecology and Evolution*, 1, 1870.
- 447 Barabás, G., Pásztor, L., Meszéna, G. & Ostling, A. (2014). Sensitivity analysis of coexistence in  
448 ecological communities: theory and application. *Ecology Letters*, 17, 1479–1494.
- 449 Bartomeus, I. & Godoy, O. (2018). Biotic controls of plant coexistence. *Journal of Ecology*, 106,  
450 1767–1772.
- 451 Bastolla, U., Fortuna, M. A., Pascual-García, A., Ferrera, A., Luque, B. & Bascompte, J. (2009).  
452 The architecture of mutualistic networks minimizes competition and increases biodiversity. *Nature*,  
453 458, 1018–1020.
- 454 Blowes, S. A., Supp, S. R., Antão, L. H., Bates, A., Bruelheide, H., Chase, J. M., Moyes, F.,  
455 Magurran, A., McGill, B., Myers-Smith, I. H. *et al.* (2019). The geography of biodiversity change  
456 in marine and terrestrial assemblages. *Science*, 366, 339–345.

- 457 Bøhn, T., Amundsen, P.-A. & Sparrow, A. (2008). Competitive exclusion after invasion? *Biological*  
458 *Invasions*, 10, 359–368.
- 459 Broekman, M. J., Muller-Landau, H. C., Visser, M. D., Jongejans, E., Wright, S. & de Kroon, H.  
460 (2019). Signs of stabilisation and stable coexistence. *Ecology Letters*, 22, 1957–1975.
- 461 Brown, J. H. (1971). Mechanisms of competitive exclusion between two species of chipmunks. *Ecology*,  
462 52, 305–311.
- 463 Case, T. J. (1995). Surprising behavior from a familiar model and implications for competition  
464 theory. *The American Naturalist*, 146, 961–966.
- 465 Case, T. J. (1999). Illustrated guide to theoretical ecology. *Ecology*, 80, 2848–2848.
- 466 Cenci, S. & Saavedra, S. (2018). Structural stability of nonlinear population dynamics. *Physical*  
467 *Review E*, 97, 12401.
- 468 Chesson, P. (2000). Mechanisms of maintenance of species diversity. *Annual Review of Ecology,*  
469 *Evolution, and Systematics*, 31, 343–366.
- 470 Chesson, P. (2018). Updates on mechanisms of maintenance of species diversity. *Journal of Ecology*,  
471 106, 1773–1794.
- 472 Chesson, P. & Kuang, J. J. (2008). The interaction between predation and competition. *Nature*, 456,  
473 235–238.
- 474 Chisholm, R. A. & Fung, T. (2018). Comment on “plant diversity increases with the strength of  
475 negative density dependence at the global scale”. *Science*, 360.
- 476 Corbin, J. D. & D’Antonio, C. M. (2004). Competition between native perennial and exotic annual  
477 grasses: implications for an historical invasion. *Ecology*, 85, 1273–1283.
- 478 Crawley, M. & May, R. (1987). Population dynamics and plant community structure: competition  
479 between annuals and perennials. *Journal of Theoretical Biology*, 125, 475–489.
- 480 Detto, M., Visser, M. D., Wright, S. J. & Pacala, S. W. (2019). Bias in the detection of negative  
481 density dependence in plant communities. *Ecology Letters*, 22, 1923–1939.
- 482 Friedman, J., Higgins, L. M. & Gore, J. (2017). Community structure follows simple assembly rules  
483 in microbial microcosms. *Nature Ecology and Evolution*, 1, 109.
- 484 Fukami, T. (2015). Historical contingency in community assembly: integrating niches, species pools,  
485 and priority effects. *Annual Review of Ecology, Evolution, and Systematics*, 46, 1–23.

- 486 Fukami, T., Mordecai, E. A. & Ostling, A. (2016). A framework for priority effects. *Journal of*  
487 *Vegetation Science*, 27, 655–657.
- 488 Gallien, L., Zimmermann, N. E., Levine, J. M. & Adler, P. B. (2017). The effects of intransitive  
489 competition on coexistence. *Ecology Letters*, 20, 791–800.
- 490 Gause, G. F. (1932). Experimental studies on the struggle for existence: I. mixed population of two  
491 species of yeast. *Journal of Experimental Biology*, 9, 389–402.
- 492 Gea-Izquierdo, G., Gennet, S. & Bartolome, J. W. (2007). Assessing plant-nutrient relationships in  
493 highly invaded californian grasslands using non-normal probability distributions. *Applied vegetation*  
494 *science*, 10, 343–350.
- 495 Gilpin, M. E. & Justice, K. E. (1972). Reinterpretation of the invalidation of the principle of  
496 competitive exclusion. *Nature*, 236, 273–274.
- 497 Godoy, O., Kraft, N. J. & Levine, J. M. (2014). Phylogenetic relatedness and the determinants of  
498 competitive outcomes. *Ecology Letters*, 17, 836–844.
- 499 Godoy, O. & Levine, J. M. (2014a). Phenology effects on invasion success: insights from coupling  
500 field experiments to coexistence theory. *Ecology*, 95, 726–736.
- 501 Godoy, O. & Levine, J. M. (2014b). Phenology effects on invasion success: insights from coupling  
502 field experiments to coexistence theory. *Ecology*, 95, 726–736.
- 503 Goldford, J. E., Lu, N., Bajić, D., Estrela, S., Tikhonov, M., Sanchez-Gorostiaga, A., Segrè, D.,  
504 Mehta, P. & Sanchez, A. (2018). Emergent simplicity in microbial community assembly. *Science*,  
505 361, 469–474.
- 506 Grainger, T. N., Letten, A. D., Gilbert, B. & Fukami, T. (2019). Applying modern coexistence  
507 theory to priority effects. *Proceedings of the National Academy of Sciences*, 116, 6205–6210.
- 508 Grainger, T. N., Rego, A. I. & Gilbert, B. (2018). Temperature-dependent species interactions shape  
509 priority effects and the persistence of unequal competitors. *The American Naturalist*, 191, 197–209.
- 510 Grilli, J., Adorisio, M., Suweis, S., Barabás, G., Banavar, J. R., Allesina, S. & Maritan, A. (2017).  
511 Feasibility and coexistence of large ecological communities. *Nature Communications*, 8, 14389.
- 512 Hamilton, J. G., Holzapfel, C. & Mahall, B. E. (1999). Coexistence and interference between a native  
513 perennial grass and non-native annual grasses in california. *Oecologia*, 121, 518–526.
- 514 Hardin, G. (1960). The competitive exclusion principle. *Science*, 131, 1292–1297.

- 515 Hülsmann, L. & Hartig, F. (2018). Comment on “plant diversity increases with the strength of  
516 negative density dependence at the global scale”. *Science*, 360.
- 517 Ives, A. R. & Carpenter, S. R. (2007). Stability and diversity of ecosystems. *Science*, 317, 58–62.
- 518 Johnson, C. A. & Bronstein, J. L. (2019). Coexistence and competitive exclusion in mutualism.  
519 *Ecology*, 100, e02708.
- 520 Ke, P.-J. & Letten, A. D. (2018). Coexistence theory and the frequency-dependence of priority  
521 effects. *Nature Ecology and Evolution*, 2, 1691–1695.
- 522 Ke, P.-J. & Wan, J. (2020). Effects of soil microbes on plant competition: a perspective from modern  
523 coexistence theory. *Ecological Monographs*, 90, e01391.
- 524 Kinlock, N. L. (2019). A meta-analysis of plant interaction networks reveals competitive hierarchies  
525 as well as facilitation and intransitivity. *The American Naturalist*, 194, 640–653.
- 526 Kisdi, E. & Geritz, S. A. (2003). On the coexistence of perennial plants by the competition-  
527 colonization trade-off. *The American Naturalist*, 161, 350–354.
- 528 Kraft, N. J., Adler, P. B., Godoy, O., James, E. C., Fuller, S. & Levine, J. M. (2015). Community  
529 assembly, coexistence and the environmental filtering metaphor. *Functional Ecology*, 29, 592–599.
- 530 LaManna, J. A., Mangan, S. A., Alonso, A., Bourg, N. A., Brockelman, W. Y., Bunyavejchewin, S.,  
531 Chang, L.-W., Chiang, J.-M., Chuyong, G. B., Clay, K. *et al.* (2017). Plant diversity increases  
532 with the strength of negative density dependence at the global scale. *Science*, 356, 1389–1392.
- 533 Lawton, J. H. (1999). Are there general laws in ecology? *Oikos*, 84, 177–192.
- 534 Levine, J. M., Bascompte, J., Adler, P. B. & Allesina, S. (2017). Beyond pairwise mechanisms of  
535 species coexistence in complex communities. *Nature*, 546, 56.
- 536 Levine, J. M. & HilleRisLambers, J. (2009). The importance of niches for the maintenance of species  
537 diversity. *Nature*, 461, 254–257.
- 538 Logofet, D. O. (1993). Matrices and graphs. *Stability Problems in Mathematical Ecology*, CRC, Boca  
539 *Ratón, FL*.
- 540 Lundgren, M. R. & Des Marais, D. L. (2020). Life history variation as a model for understanding  
541 trade-offs in plant–environment interactions. *Current Biology*, 30, R180–R189.
- 542 May, R. M. (1972). Will a large complex system be stable? *Nature*, 238, 413.

- 543 Mayfield, M. M. & Levine, J. M. (2010). Opposing effects of competitive exclusion on the phylogenetic  
544 structure of communities. *Ecology Letters*, 13, 1085–1093.
- 545 McCann, K. S. (2000). The diversity–stability debate. *Nature*, 405, 228.
- 546 McGeoch, M. A., Genovesi, P., Bellingham, P. J., Costello, M. J., McGrannachan, C. & Sheppard,  
547 A. (2016). Prioritizing species, pathways, and sites to achieve conservation targets for biological  
548 invasion. *Biological Invasions*, 18, 299–314.
- 549 Meszéna, G., Gyllenberg, M., Pásztor, L. & Metz, J. A. (2006). Competitive exclusion and limiting  
550 similarity: a unified theory. *Theoretical Population Biology*, 69, 68–87.
- 551 Mordecai, E. A. (2011). Pathogen impacts on plant communities: unifying theory, concepts, and  
552 empirical work. *Ecological Monographs*, 81, 429–441.
- 553 Mordecai, E. A. (2013). Consequences of pathogen spillover for cheatgrass-invaded grasslands: co-  
554 existence, competitive exclusion, or priority effects. *The American Naturalist*, 181, 737–747.
- 555 Mordecai, E. A., Molinari, N. A., Stahlheber, K. A., Gross, K. & D’Antonio, C. (2015). Controls  
556 over native perennial grass exclusion and persistence in california grasslands invaded by annuals.  
557 *Ecology*, 96, 2643–2652.
- 558 Myers, N., Mittermeier, R. A., Mittermeier, C. G., Da Fonseca, G. A. & Kent, J. (2000). Biodiversity  
559 hotspots for conservation priorities. *Nature*, 403, 853–858.
- 560 Narwani, A., Alexandrou, M. A., Oakley, T. H., Carroll, I. T. & Cardinale, B. J. (2013). Experimental  
561 evidence that evolutionary relatedness does not affect the ecological mechanisms of coexistence in  
562 freshwater green algae. *Ecology Letters*, 16, 1373–1381.
- 563 Odum, E. P., Odum, H. T. & Andrews, J. (1971). *Fundamentals of ecology*, vol. 3. Saunders  
564 Philadelphia.
- 565 Rees, M. & Long, M. J. (1992). Germination biology and the ecology of annual plants. *The American*  
566 *Naturalist*, 139, 484–508.
- 567 Roberts, A. (1974). The stability of a feasible random ecosystem. *Nature*, 251, 607–608.
- 568 Rohr, R. P., Saavedra, S. & Bascompte, J. (2014). On the structural stability of mutualistic systems.  
569 *Science*, 345, 1253497.
- 570 Saavedra, S., Medeiros, L. P. & AlAdwani, M. (2020). Structural forecasting of species persistence  
571 under changing environments. *Ecology Letters*, 23, 1511–1521.

- 572 Saavedra, S., Rohr, R. P., Bascompte, J., Godoy, O., Kraft, N. J. & Levine, J. M. (2017). A structural  
573 approach for understanding multispecies coexistence. *Ecological Monographs*, 87, 470–486.
- 574 Seabloom, E. W. (2011). Spatial and temporal variability in propagule limitation of california native  
575 grasses. *Oikos*, 120, 291–301.
- 576 Seabloom, E. W., Harpole, W. S., Reichman, O. & Tilman, D. (2003). Invasion, competitive dom-  
577 inance, and resource use by exotic and native california grassland species. *Proceedings of the*  
578 *National Academy of Sciences*, 100, 13384–13389.
- 579 Sigmund, K. (1995). Darwin’s circles of complexity: Assembling ecological communities. *Complexity*,  
580 1, 40–44.
- 581 Soliveres, S., Maestre, F. T., Ulrich, W., Manning, P., Boch, S., Bowker, M. A., Prati, D., Delgado-  
582 Baquerizo, M., Quero, J. L., Schöning, I. *et al.* (2015). Intransitive competition is widespread in  
583 plant communities and maintains their species richness. *Ecology Letters*, 18, 790–798.
- 584 Song, C. (2020). Structural stability: concepts, methods, and applications. *Biodiversity Science*, 28,  
585 1345–1361.
- 586 Song, C., Altermatt, F., Pearse, I. & Saavedra, S. (2018a). Structural changes within trophic levels  
587 are constrained by within-family assembly rules at lower trophic levels. *Ecology Letters*, 21, 1221–  
588 1228.
- 589 Song, C., Barabás, G. & Saavedra, S. (2019). On the consequences of the interdependence of stabi-  
590 lizing and equalizing mechanisms. *The American Naturalist*, 194, 627–639.
- 591 Song, C., Rohr, R. P. & Saavedra, S. (2018b). A guideline to study the feasibility domain of multi-  
592 trophic and changing ecological communities. *Journal of Theoretical Biology*, 450, 30–36.
- 593 Song, C., Rohr, R. P., Vasseur, D. & Saavedra, S. (2020a). Disentangling the effects of external  
594 perturbations on coexistence and priority effects. *Journal of Ecology*, 108, 1677–1689.
- 595 Song, C. & Saavedra, S. (2018). Will a small randomly assembled community be feasible and stable?  
596 *Ecology*, 99, 743–751.
- 597 Song, C. & Saavedra, S. (2020). Telling ecological networks apart by their structure: an environment-  
598 dependent approach. *PLoS Computational Biology*, 16, e1007787.
- 599 Song, C., Von Ahn, S., Rohr, R. P. & Saavedra, S. (2020b). Towards a probabilistic understanding  
600 about the context-dependency of species interactions. *Trends in Ecology & Evolution*, 35, 384–396.

- 601 Tabi, A., Pennekamp, F., Altermatt, F., Alther, R., Fronhofer, E. A., Horgan, K., Machler, E.,  
602 Pontarp, M., Petchey, O. L. & Saavedra, S. (2020). Species multidimensional effects explain  
603 idiosyncratic responses of communities to environmental change. *Nature Ecology & Evolution*,  
604 doi.org/10.1038/s41559-020-1206-6.
- 605 Tan, J., Yang, X. & Jiang, L. (2017). Species ecological similarity modulates the importance of  
606 colonization history for adaptive radiation. *Evolution*, 71, 1719–1727.
- 607 Thébault, E. & Fontaine, C. (2010). Stability of ecological communities and the architecture of  
608 mutualistic and trophic networks. *Science*, 329, 853–856.
- 609 Uricchio, L. H., Daws, S. C., Spear, E. R. & Mordecai, E. A. (2019). Priority effects and nonhierar-  
610 chical competition shape species composition in a complex grassland community. *The American*  
611 *Naturalist*, 193, 213–226.
- 612 Vellend, M. (2016). *The theory of ecological communities*. Princeton University Press, Princeton,  
613 NJ.
- 614 Violle, C., Nemergut, D. R., Pu, Z. & Jiang, L. (2011). Phylogenetic limiting similarity and compet-  
615 itive exclusion. *Ecology Letters*, 14, 782–787.
- 616 Werner, C. M., Vaughn, K. J., Stuble, K. L., Wolf, K. & Young, T. P. (2016). Persistent asymmetrical  
617 priority effects in a california grassland restoration experiment. *Ecological Applications*, 26, 1624–  
618 1632.
- 619 Zhao, N., Saavedra, S. & Liu, Y.-Y. (2020). The impact of colonization history on the composition  
620 of ecological systems. *bioRxiv*.



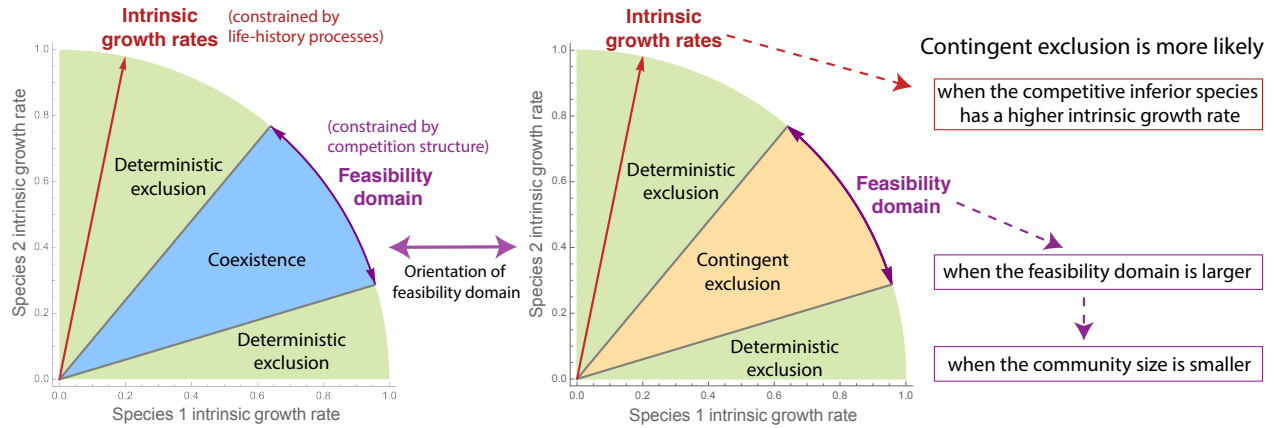

**Figure 1: Three key intuitions on competitive exclusion following a structural approach.**

For a hypothetical community with two competing species, the figure shows the parameter space defined by the intrinsic growth rates (phenomenological abiotic conditions) of the two species. The feasibility domain (middle blue or orange region) is the set of all directions of intrinsic growth rates compatible with a feasible equilibrium. If the feasible equilibrium is dynamically unstable, the region corresponds parameters that are compatible with contingent exclusion (right panel: orange region); if the feasible equilibrium is dynamically stable, the region is compatible with stable coexistence (left panel: blue region). The complement of the feasibility domain regardless of dynamical stability (green region) corresponds to the directions of intrinsic growth rates associated with deterministic exclusion. Following the structural approach in ecology, we can derive three key intuitions: (i) Contingent exclusion is expected to be more likely when the competitive inferior species has a higher intrinsic growth rate. (ii) Contingent exclusion is more likely when the feasibility domain is larger. (iii) Contingent exclusion is more likely when the community size is smaller. The ecological rationale is that adding a new species generally further constrains the feasibility domain to be smaller. Note that the third intuition is a corollary from the second intuition since the feasibility domain generally shrinks with community size.

### A. Annual species

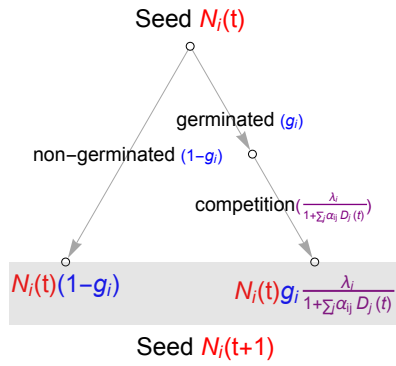

### B. Perennial species

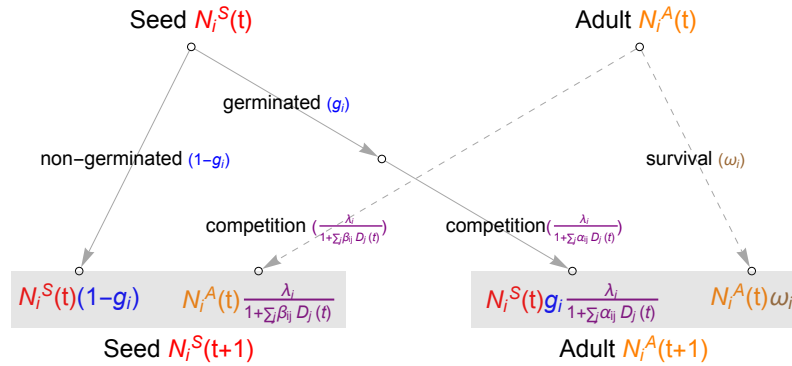

Figure 2: **Population dynamics of annual and perennial plant species.** Panel (A) illustrates the population dynamics of an annual plant species (Eqn. 1). Annual plant dynamics are tracked as seeds entering each growing season. Some annual seeds germinate, and the germinated seeds produce seeds at a rate reduced by competition from other plant species. Panel (B) illustrates the dynamics of a perennial plant species (Eqn. 3 and 4). The perennial plant has two life stages, seed and adult. Some perennial seeds germinate, and the germinated seeds would produce adults at a rate reduced by competition from other plant species (left side). Perennial life history: some perennial adults survive as perennials, while some perennial adults produce seeds and are decreased by competition from other plant species (right side, dashed lines). Note that the dynamics of perennial plants can be modeled with or without these perennial life-history processes.

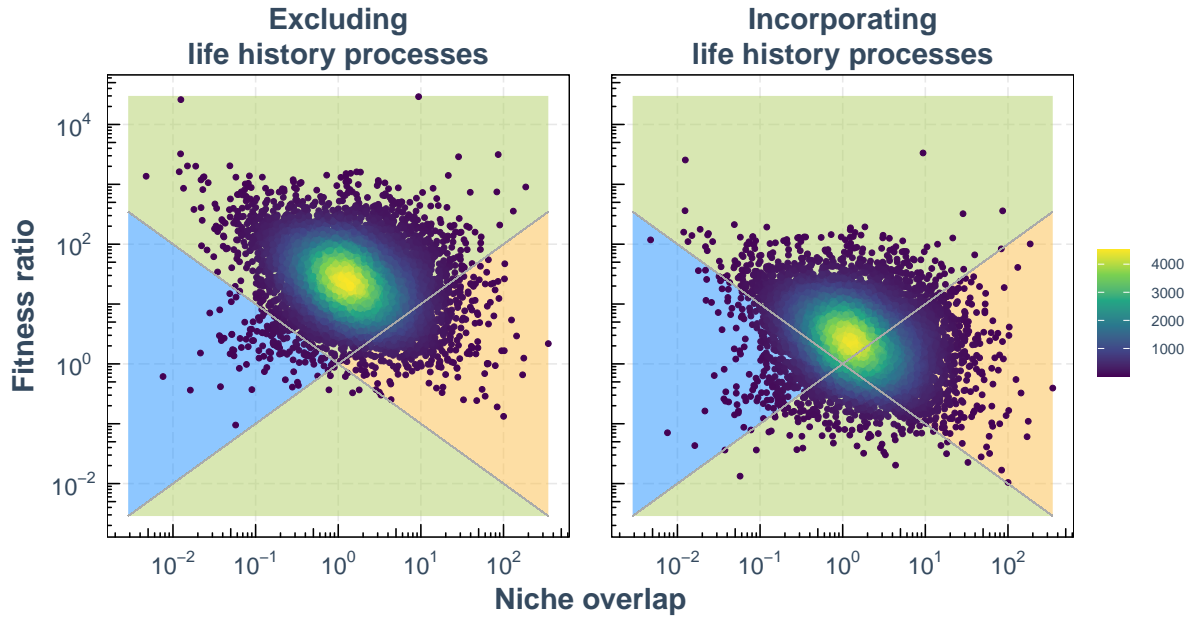

**Figure 3: Perennial life-history processes increase the frequency of contingent exclusion by increasing the effective intrinsic growth rates of perennials.** Plots represent two-species dynamics based on niche overlap (horizontal axis) and species average fitness ratio (vertical axis) between a pair of one annual species and one perennial species. This space is divided into three regions: deterministic exclusion (green), coexistence (blue), and contingent exclusion (orange). The left panel shows the case when perennial life-history processes are not incorporated into the model, while the right panel shows the case when perennial life-history processes are incorporated. Each point represents a pair of species average fitness ratio and niche overlap computed from 2,000 posterior samples from the posterior distribution of parameter values (the color map represents the density of the points). Note that the species average fitness ratio here refers to the ratio of annual fitness to the perennial fitness, so that the upper green regions correspond to annual-dominated deterministic exclusion and the lower green regions to perennial dominance. Perennial life-history processes only influence the effective intrinsic growth rates, but not the effective competition strength (i.e., life-history processes only change fitness ratios). This implies that including perennial life-history processes increases the proportion of the posterior distribution that falls into the contingent exclusion region (orange region). The details of computing fitness ratio and niche overlap can be found in Appendices A and C, and plots for individual pairs can be found in Appendix E.

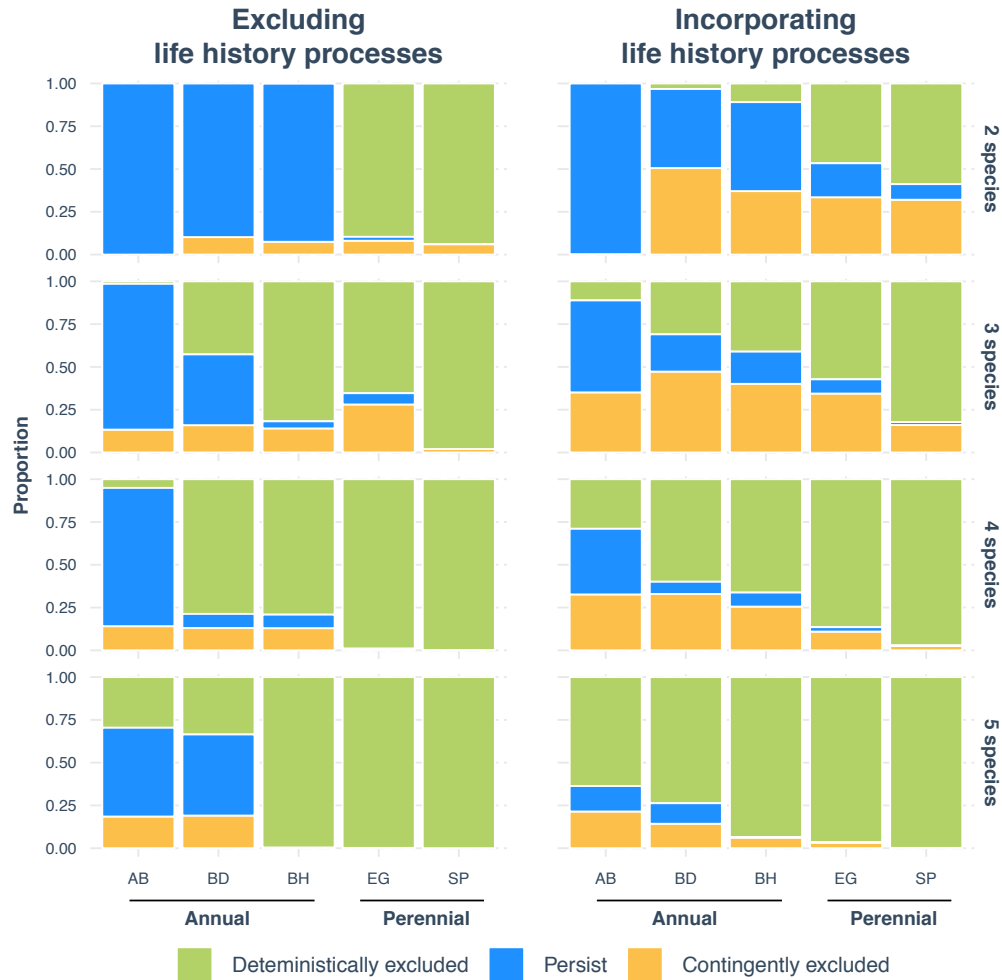

**Figure 4: Contingent exclusion is less likely when the community size is larger.** We show how the proportions of contingent exclusion, deterministic exclusion, and persistence for each of the five focal species change with community size. The horizontal axis denotes the plant species, where AB stands for *Avena barbata*, BH for *Bromus hordeaceus*, BD for *Bromus diandrus*, EG for *Elymus glaucus*, and SP for *Stipa pulchra*. AB, BD, and BH are annual species while EG and SP are perennial species. We tested all the possible  $n$ -species combinations with both annual and perennial species present using 2,000 posterior parameter samples. The vertical axis denotes the average proportion of occurrences of deterministic exclusion (green), persistence (blue), or contingent exclusion (orange) in all these combinations. The left and right panels show the case when perennial life-history processes are excluded and included into the model, respectively. The vertical panels show the patterns in each community size (from two-species communities to five-species communities). We found that the proportion of deterministically-excluded species increases with increasing community size (the opposite patterns for contingent exclusion).

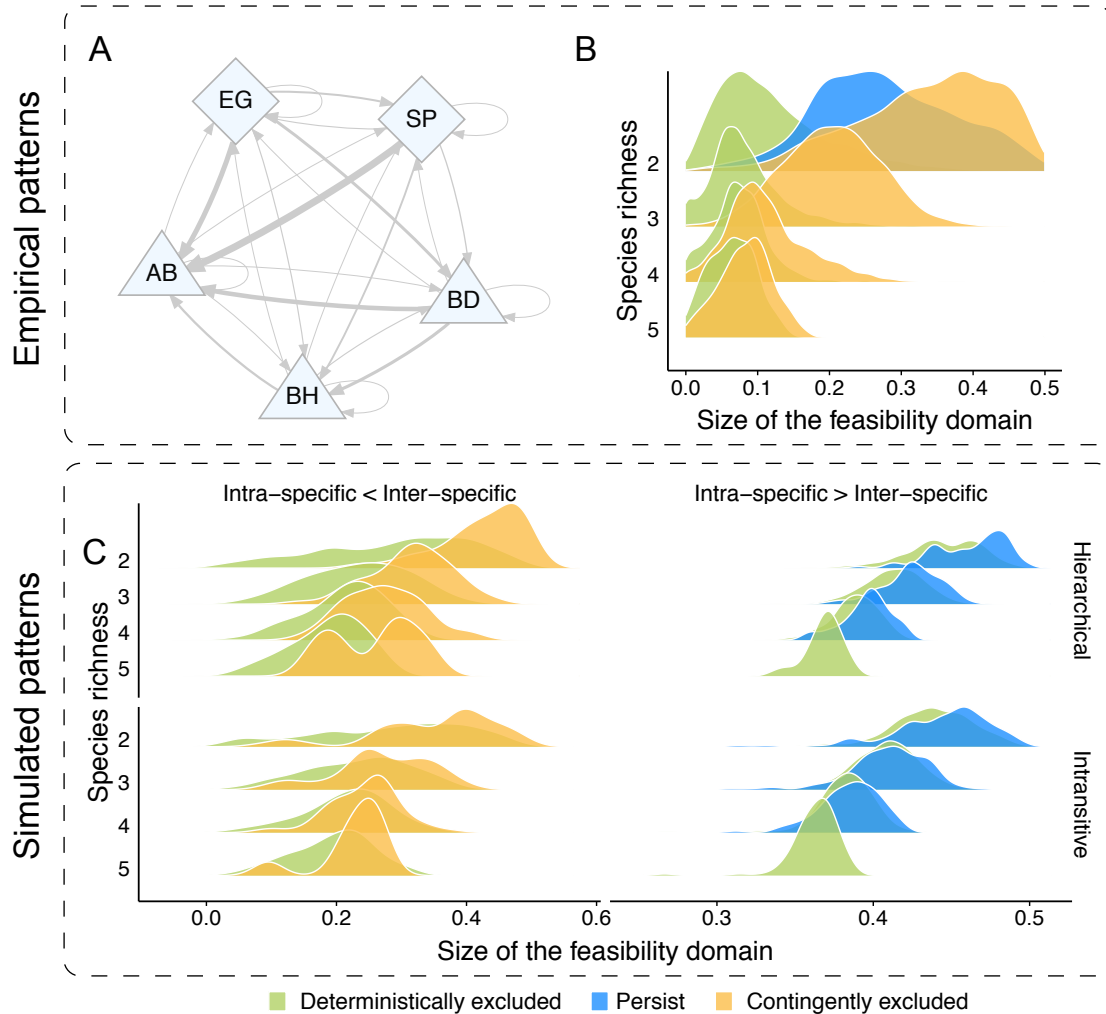

**Figure 5: Weak intraspecific and not intransitive competition drives the patterns of competitive exclusion.** Panel (A) shows the competition structure among annuals and perennials in the empirical data from California grassland plant species. Each node represents a plant species, where the triangles (*Avena barbata* (AB), *Bromus hordeaceus* (BH), and *Bromus diandrus* (BD)) are annuals and the diamonds (*Elymus glaucus* (EG) and *Stipa pulchra* (SP)) are perennials. The direction and width of the links represent the direction and strength (averaged from the posterior samples) of competition. We observe two key structures: (i) intraspecific competition (self-loops) is in general weaker than interspecific competition (edges), and (ii) competition is intransitive (non-hierarchical). Panel (B) shows the outcome of competition—deterministically excluded, persist, or contingently excluded—for each empirically-derived parameter set, grouped into histograms by qualitative outcome. We characterize the competition structure of a community across different community sizes using the normalized size of the feasibility domain (horizontal axis). The empirical data show that deterministic exclusion (green histograms) is mostly characterized by structures with a relatively small feasibility domain. Contingent exclusion (orange histograms) have the opposite patterns. Panel (C) shows the theoretical expectations about how competition structure affects the patterns of competitive exclusion. We show model-generated communities with different competition structures. We use two structural combinations: (i) communities with either a low (intraspecific < interspecific) or high (intraspecific > interspecific) intraspecific competition, and (ii) communities with either a hierarchical or intransitive competition structure. We find that the competition structures with weaker intraspecific competition, regardless of being hierarchical or not, produce qualitatively the same patterns as the empirical patterns shown in Panel (B).

## Supplementary Material for

# Understanding the emergence of contingent and deterministic exclusion in multispecies communities

Chuliang Song<sup>1</sup>, Lawrence H. Uricchio<sup>2</sup>, Erin A. Mordecai<sup>3</sup>, Serguei Saavedra<sup>1</sup>

<sup>1</sup>Department of Civil and Environmental Engineering, MIT,  
77 Massachusetts Av., 02139 Cambridge, MA, USA

<sup>2</sup>Department of Integrative Biology, University of California, Berkeley,  
Berkeley, CA, USA

<sup>3</sup>Biology Department, Stanford University, Stanford,  
California 94305 USA

## Contents

|          |                                                                                                    |            |
|----------|----------------------------------------------------------------------------------------------------|------------|
| <b>A</b> | <b>A brief introduction to Modern Coexistence Theory on competitive exclusion</b>                  | <b>S2</b>  |
| <b>B</b> | <b>Interpretation of Structural Approach in different theoretical formalisms</b>                   | <b>S3</b>  |
| <b>C</b> | <b>Applying the structural approach to the population dynamics of annual and perennial species</b> | <b>S4</b>  |
| <b>D</b> | <b>Disentangling sources of environmental stress</b>                                               | <b>S8</b>  |
| <b>E</b> | <b>Effects of life-history processes</b>                                                           | <b>S10</b> |
| <b>F</b> | <b>Effects of community size</b>                                                                   | <b>S12</b> |
| <b>G</b> | <b>Effects of competition structure</b>                                                            | <b>S13</b> |

## A A brief introduction to Modern Coexistence Theory on competitive exclusion

Modern Coexistence Theory (MCT) is widely adopted to study competitive exclusion (Chesson, 2000; Fukami *et al.*, 2016; Ke & Letten, 2018). The canonical formalism of MCT on two-species communities builds upon Lotka-Volterra (LV) competition dynamics. The formulation of two-species LV competition dynamics is written as

$$\begin{cases} \frac{dN_1}{dt} = N_1(r_1 - \alpha_{11}N_1 - \alpha_{12}N_2) \\ \frac{dN_2}{dt} = N_2(r_2 - \alpha_{21}N_1 - \alpha_{22}N_2), \end{cases} \quad (\text{S1})$$

where the variable  $N_i$  represents the abundance of species  $i$ , the parameters  $r_i > 0$  and  $\alpha_{ii} > 0$  correspond to the intrinsic growth rate and the self-regulation (or intra-specific competition) of species  $i$ , respectively, and  $\alpha_{12} > 0$  and  $\alpha_{21} > 0$  are the corresponding interspecific competition strengths.

From the LV competition dynamics, MCT defines niche overlap  $\rho$  as  $\rho = \sqrt{\alpha_{12}\alpha_{21}/\alpha_{11}\alpha_{22}}$ , and species average fitness ratio  $\kappa_2/\kappa_1$  as  $r_2/r_1\sqrt{\alpha_{11}\alpha_{12}/\alpha_{22}\alpha_{21}}$  (Chesson, 2018; Bartomeus & Godoy, 2018). Building upon these two concepts, MCT claims that contingent exclusion arises when

$$\frac{1}{\rho} < \frac{\kappa_2}{\kappa_1} < \rho, \quad (\text{S2})$$

and deterministic exclusion arises when

$$\frac{\kappa_2}{\kappa_1} > \max\left\{\frac{1}{\rho}, \rho\right\} \text{ or } \frac{\kappa_2}{\kappa_1} < \min\left\{\frac{1}{\rho}, \rho\right\} \quad (\text{S3})$$

These conditions are illustrated in Figure 3. Note that we used the effective intrinsic growth rates and competition strength in Figure 3 as we translated the population dynamics of grass species into Equation S1.

## B Interpretation of Structural Approach in different theoretical formalisms

The crux of the structural approach is to simplify ecological dynamics as a function of internal and external conditions. In the main text, we have represent external conditions by intrinsic growth rates and represent internal conditions by the competition structure. Here we briefly interpret this representation across several mathematically equivalent but ecologically different theoretical formalism of Lotka-Volterra dynamics. A more detailed discussion can be found in Song *et al.* (2020a).

There are three theoretical formalisms of two-species Lotka-Volterra dynamics. The formalism we adopted in the structural approach (which we call  $r$ -formalism) is:

$$\begin{cases} \frac{dN_1}{dt} = N_1(r_1 - \alpha_{11}N_1 - \alpha_{12}N_2) \\ \frac{dN_2}{dt} = N_2(r_2 - \alpha_{21}N_1 - \alpha_{22}N_2). \end{cases} \quad (\text{S4})$$

where  $r_i$  and  $\alpha_{ij}$  are separated.

Modern Coexistence Theory usually adopts another formalism (which we call MCT-formalism):

$$\begin{cases} \frac{dN_1}{dt} = N_1r_1(1 - \bar{\alpha}_{11}N_1 - \bar{\alpha}_{12}N_2) \\ \frac{dN_2}{dt} = N_2r_2(1 - \bar{\alpha}_{21}N_1 - \bar{\alpha}_{22}N_2). \end{cases} \quad (\text{S5})$$

where  $\bar{\alpha}_{ij} = \alpha_{ij}/r_i$ . Thus, under the MCT-formalism,  $r_i$  and  $\bar{\alpha}_{ij}$  are interlinked.

And the third formalism (which we call  $K$ -formalism) is:

$$\begin{cases} \frac{dN_1}{dt} = N_1 \frac{r_1}{K_1} (K_1 - N_1 - a_{12}N_2) \\ \frac{dN_2}{dt} = N_2 \frac{r_2}{K_2} (K_2 - a_{21}N_1 - N_2). \end{cases} \quad (\text{S6})$$

where the competition strength is to be standardized by the intraspecific competition, i.e.,  $a_{ij} = \alpha_{ij}/\alpha_{ii}$ .

We first focus on the link between  $r$ -formalism and MCT-formalism. The ecological interpretations are fundamentally different in these two formalisms. The reason is that while  $\alpha_{ij}$  and  $\bar{\alpha}_{ij}$  are both called interaction strengths, they have different **units**:  $\alpha_{ij}$  in the  $r$ -formalism measures the absolute reduction in the growth rates, while  $\bar{\alpha}_{ij}$  in the MCT-formalism measures the relative reduction in the growth rates to the maximum growth rates. The reason why we have adopted the  $r$ -formalism is that  $\alpha_{ij}$  in the  $r$ -formalism is what most empirical studies measure.

We then focus on the link between  $r$ -formalism and  $K$ -formalism. To establish the equivalence between the  $r$ -formalism and the  $K$ -formalism, the carrying capacity  $K_i$  of species  $i$  and the intrinsic growth rates are linked via  $K_i = r_i/\alpha_{ii}$ . Thus, if we assume that  $\alpha_{ii}$  is fixed (which is a common assumption in theoretical and empirical studies), then  $K_i$  and  $r_i$  would reflect identical biotic or abiotic information.



## C Applying the structural approach to the population dynamics of annual and perennial species

### C.1 A brief introduction of the structural approach

Here we present a brief, self-contained description of the structural approach in community ecology. A more detailed, technical description can be found in Song *et al.* (2018b).

Consider an ecological community with  $S$  interacting species governed by some nonlinear population dynamics. Suppose the equilibrium  $\{N_j^*\}$  of the community is constrained by a set of linear equations,

$$r_i = \sum_{j=1}^S a_{ij} N_j^*, i = 1, \dots, S \quad (\text{S7})$$

where  $r_i$  is referred as the effective intrinsic growth rate and  $a_{ij}$  is referred as the effective interaction strength.

Feasibility of the community refers to the situation in which the equilibrium of all species is positive (i.e.,  $N_j^* > 0$ , for all  $j$ ) (Roberts, 1974). The feasibility domain  $D_F$ —the full set of intrinsic growth rates  $r_i$  that gives rise to feasibility—is given by (Logofet, 1993; Song *et al.*, 2018b):

$$D_F = \{ \mathbf{r} \mid \mathbf{r} = -N_1^* \mathbf{v}_1 - \dots - N_S^* \mathbf{v}_S, \text{ with } N_1^*, \dots, N_S^* > 0 \}, \quad (\text{S8})$$

where  $\mathbf{v}_i = \{a_{1i}, \dots, a_{Si}\}$  is the  $i$ th column vector of the interaction matrix.

Importantly, the operation of positive scalar multiplication on the column space of the effective competition structure  $\mathbf{A}$  does not change the feasibility domain (Song *et al.*, 2018b). Specifically,  $\mathbf{v}_i \rightarrow c_i \mathbf{v}_i$  when  $c_i$  is some positive constant (equivalently, changing the effective competition strength from  $a_{ij}$  to  $c_i a_{ij}$  for all  $j$ ) does not change the feasibility domain.

### C.2 Annual species

We first apply the structural approach to the population dynamics of annual species. As a reminder, the population dynamics of annual species is written as:

$$N_i(t+1) = \underbrace{N_i(t) g_i \frac{\lambda_i}{1 + \sum_j \alpha_{ij} D_j(t)}}_{\text{germinated seeds under competition}} + \underbrace{N_i(t)(1 - g_i)}_{\text{non-germinated seeds}}, \quad (\text{S9})$$

To perform the feasibility analysis in the structural approach, we focus on the equilibrium

$N_i(t+1) = N_i(t)$ . The equilibrium condition is equivalent to:

$$N_i(t+1) = N_i(t) \quad (\text{S10})$$

$$\Leftrightarrow N_i(t)g_i \frac{\lambda_i}{1 + \sum_j \alpha_{ij} D_j(t)} + N_i(t)(1 - g_i) = N_i(t) \quad (\text{S11})$$

$$\Leftrightarrow g_i \frac{\lambda_i}{1 + \sum_j \alpha_{ij} D_j(t)} + (1 - g_i) = 1 \quad (\text{S12})$$

$$\Leftrightarrow g_i \frac{\lambda_i}{1 + \sum_j \alpha_{ij} D_j(t)} - g_i = 0 \quad (\text{S13})$$

$$\Leftrightarrow \lambda_i - 1 = \sum_j \alpha_{ij} D_j(t) \quad (\text{S14})$$

Substituting the definition of  $D_j$  from Eqn. (2), the equilibrium condition can be equivalently expressed as:

$$\lambda_i - 1 = \sum_{j \in \mathcal{A}} \alpha_{ij} g_j N_j + \sum_{j \in \mathcal{P}} \alpha_{ij} g_j N_j^S, \quad i \in \mathcal{A} \quad (\text{S15})$$

### C.3 Perennial species

Then we apply the structural approach to the population dynamics of perennial species. As a reminder, the population dynamics of perennial species are written as:

$$N_i^S(t+1) = \underbrace{N_i^A(t) \frac{\lambda_i}{1 + \sum_j \alpha_{ij} D_j(t)}}_{\text{produced seeds from adults}} + \underbrace{N_i^S(t)(1 - g_i)}_{\text{non-germinated seeds}}, \quad (\text{S16})$$

$$N_i^A(t+1) = \underbrace{N_i^A(t)\omega_i}_{\text{survived adults}} + \underbrace{N_i^S(t) \frac{g_i v_i}{1 + \sum_j \beta_{ij} D_j(t)}}_{\text{germinated seeds into adults}}, \quad (\text{S17})$$

#### C.3.1 Excluding life-history processes in perennial species

When we exclude the life-history processes in perennial species, the equilibrium condition is same as that of annual species (Eqn. S15):

$$\lambda_i - 1 = \sum_{j \in \mathcal{A}} \alpha_{ij} g_j N_j + \sum_{j \in \mathcal{P}} \alpha_{ij} g_j N_j^S, \quad i \in \mathcal{P}. \quad (\text{S18})$$

#### C.3.2 Incorporating life-history processes in perennial species

**Without considering the density-dependence in transition from adults to seeds** Here we consider the case when the germinated seeds into adults are not under the pressure of

competition. Mathematically,  $\beta_{ij} = 0$  in Eqn. 4. Specifically, Eqns. 3 and 4 reduce to:

$$g_i N_i^S = N_i^A \frac{\lambda_i}{1 + \sum_{j \in \mathcal{A}} \alpha_{ij} g_j N_j + \sum_{j \in \mathcal{P}} \alpha_{ij} g_j N_j^S + \sum_{j \in \mathcal{P}} \alpha_{ij} N_j^A}, \quad (\text{S19})$$

$$N_i^A = N_i^S \frac{g_i v_i}{1 - \omega_i}. \quad (\text{S20})$$

Substituting the expression of  $N_i^A$  from Eqn. (S20) into Eqn. (S19), the equilibrium conditions are:

$$g_i N_i^S = N_i^S \frac{g_i v_i}{1 - \omega_i} \frac{\lambda_i}{1 + \sum_{j \in \mathcal{A}} \alpha_{ij} g_j N_j + \sum_{j \in \mathcal{P}} \alpha_{ij} g_j N_j^S + \sum_{j \in \mathcal{P}} \alpha_{ij} N_j^S \frac{g_j v_j}{1 - \omega_j}} \quad (\text{S21})$$

Then the equilibrium condition can be equivalently expressed as:

$$\frac{v_i \lambda_i}{1 - \omega_i} - 1 = \sum_{j \in \mathcal{A}} \alpha_{ij} g_j N_j + \sum_{j \in \mathcal{P}} \alpha_{ij} g_j \left(1 + \frac{v_j}{1 - \omega_j}\right) N_j^S, \text{ if } i \in \mathcal{P} \quad (\text{S22})$$

The key difference between Eqn. S18 and S22 is the change of effective parameters:

$$\text{Effective intrinsic growth rate: } \lambda_i - 1 \rightarrow \frac{v_i \lambda_i}{1 - \omega_i} - 1 \quad (\text{S23})$$

$$\text{Effective competition strength: } \alpha_{ij} g_j \rightarrow \alpha_{ij} g_j \left(1 + \frac{v_j}{1 - \omega_j}\right) \quad (\text{S24})$$

With the effective parameters according to the transformations listed in Eqns. S23 and S24, we would have a system of equations with exactly the same dynamics as the original annual/plant dynamics.

As we have discussed in the beginning of this section, multiplication on the column space of competition strength ( $a_{ij} \rightarrow c_i a_{ij}, \forall j$ ) does not affect the feasibility domain. Here  $c_i = 1$  for annual species while  $c_i = (1 + \frac{v_i}{1 - \omega_i})$  for perennial species. Thus, the feasibility domain remains the same with or without transitions.

Note that this result does not imply that feasibility would not change with or without transitions. As a reminder, the community is feasible if and only if the effective intrinsic growth rates are inside the feasibility domain. Here, the effective intrinsic growth rates changes from  $\alpha_{ij} g_j$  to  $\alpha_{ij} g_j (1 + \frac{v_j}{1 - \omega_j})$ . Thus, feasibility (determined by both intrinsic growth rates and competition structure) may change even though the feasibility domain (determined only by the competition structure) does not change.

### C.3.3 Incorporating life-history processes in perennial species

**Considering the density-dependence in transition from adults to seeds** Here we consider the case when the seeds and adults face the same level of competition. Mathematically,  $\alpha_{ij} = \beta_{ij}$ . Specifically, Eqns. 3 and 4 reduce to:

$$g_i N_i^S = N_i^A \frac{\lambda_i}{1 + \sum_{j \in \mathcal{A}} \alpha_{ij} g_j N_j + \sum_{j \in \mathcal{P}} \alpha_{ij} g_j N_j^S + \sum_{j \in \mathcal{P}} \alpha_{ij} N_j^A} \quad (\text{S25})$$

$$N_i^A (1 - \omega_i) = N_i^S \frac{g_i v_i}{1 + \sum_{j \in \mathcal{A}} \alpha_{ij} g_j N_j + \sum_{j \in \mathcal{P}} \alpha_{ij} g_j N_j^S + \sum_{j \in \mathcal{P}} \alpha_{ij} N_j^A} \quad (\text{S26})$$

Substituting the expression of  $N_i^A$  from Eqn. (S26) into Eqn. (S25), the equilibrium conditions are:

$$g_i N_i^S = \sqrt{\frac{v_i}{\lambda_i(1-\omega_i)}} g_i N_i^S \frac{\lambda_i}{1 + \sum_{j \in \mathcal{A}} \alpha_{ij} g_j N_j + \sum_{j \in \mathcal{P}} \alpha_{ij} g_j N_j^S + \sum_{j \in \mathcal{P}} \alpha_{ij} \sqrt{\frac{v_j}{\lambda_j(1-\omega_j)}} g_j N_j^S} \quad (\text{S27})$$

Then the equilibrium condition can be equivalently expressed as:

$$\sqrt{\frac{\lambda_i v_i}{1-\omega_i}} - 1 = \sum_{j \in \mathcal{A}} \alpha_{ij} g_j N_j + \sum_{j \in \mathcal{P}} \alpha_{ij} g_j \left(1 + \sqrt{\frac{v_j}{\lambda_j(1-\omega_j)}}\right) N_j^S, \text{ if } i \in \mathcal{P} \quad (\text{S28})$$

Similarly, we have the changes of effective parameters from Eqn. S18 to Eqn. S28,

$$\text{Effective intrinsic growth rate: } \lambda_i - 1 \rightarrow \sqrt{\frac{\lambda_i v_i}{1-\omega_i}} - 1 \quad (\text{S29})$$

$$\text{Effective competition strength: } \alpha_{ij} g_j \rightarrow \alpha_{ij} g_j \left(1 + \sqrt{\frac{v_j}{\lambda_j(1-\omega_j)}}\right) \quad (\text{S30})$$

$\beta_{ij}$  is the same for all species (i.e., whether  $j \in \mathcal{A}, \mathcal{P}^S, \mathcal{P}^A$ )

$$g_i N_i^S = N_i^A \frac{\lambda_i}{1 + \sum_{j \in \mathcal{A}} \alpha_{ij} g_j N_j + \sum_{j \in \mathcal{P}} \alpha_{ij} g_j N_j^S + \sum_{j \in \mathcal{P}} \alpha_{ij} N_j^A} \quad (\text{S31})$$

$$N_i^A(1-\omega_i) = N_i^S \frac{g_i v_i}{1 + \sum_{j \in \mathcal{A}} \beta_{ij} g_j N_j + \sum_{j \in \mathcal{P}} \beta_{ij} g_j N_j^S + \sum_{j \in \mathcal{P}} \beta_{ij} N_j^A} \quad (\text{S32})$$

## D Disentangling sources of environmental stress

Here we apply the methods from (Song *et al.*, 2020a) to disentangle the effects of parameter perturbations on species pairs. In general, a species pair exhibits a trade-off between the structural stability (tolerance) in competition strength and in intrinsic growth rates. Figure S1 illustrates this trade-off, which is the same for both coexistence and priority effects (Song *et al.*, 2020a).

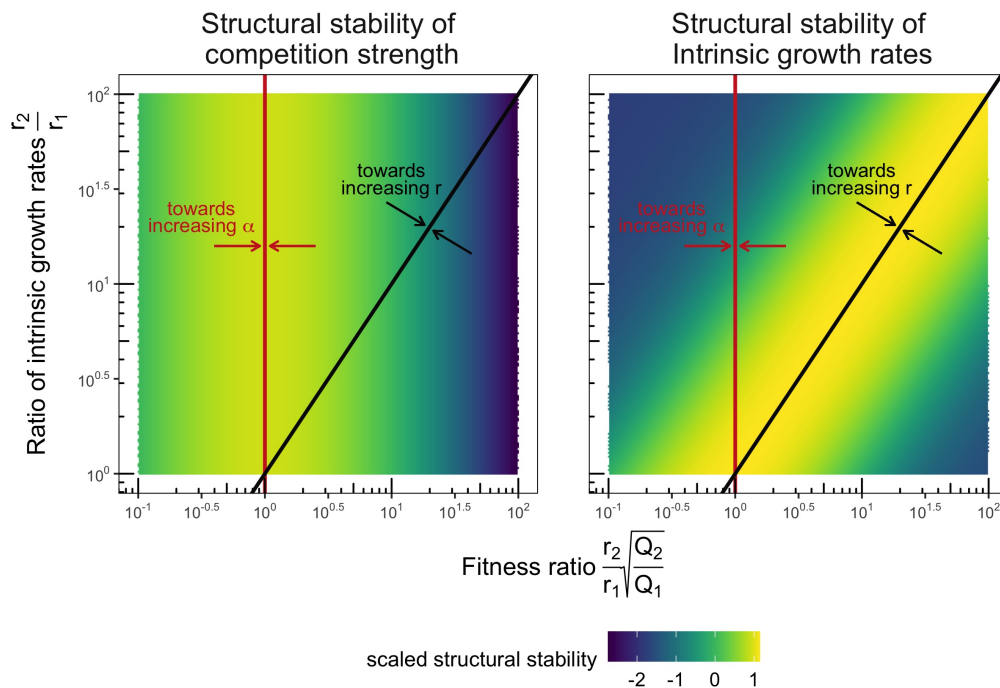

Figure S1: **Trade-off between structural stability in competition strength and in intrinsic growth rates.** The structural stability in competition strength is increased following the red arrows, and is maximized on the red line (i.e. species average fitness equivalence). The structural stability in intrinsic growth rates is increased following the black arrows, and is maximized on the black line (i.e., species average fitness ratio equals to the ratio of intrinsic growth rates). The color represents the scaled structural stability, where the yellow indicates high while the purple indicates low.

Applying this method to species pairs in the grassland community, Figure S2 shows that: (1) The perennial pairs are robust to both parameter perturbations in intrinsic growth rates and in the competition strength. (2) The annual pairs are more likely to persist under parameter perturbations in the competition strength but not in the intrinsic growth rates. (3) The mixed pairs of one annual and one perennial are robust to changes in intrinsic growth rates only when we exclude the life history processes, but are robust to changes in competition strength only when we incorporate life history processes.

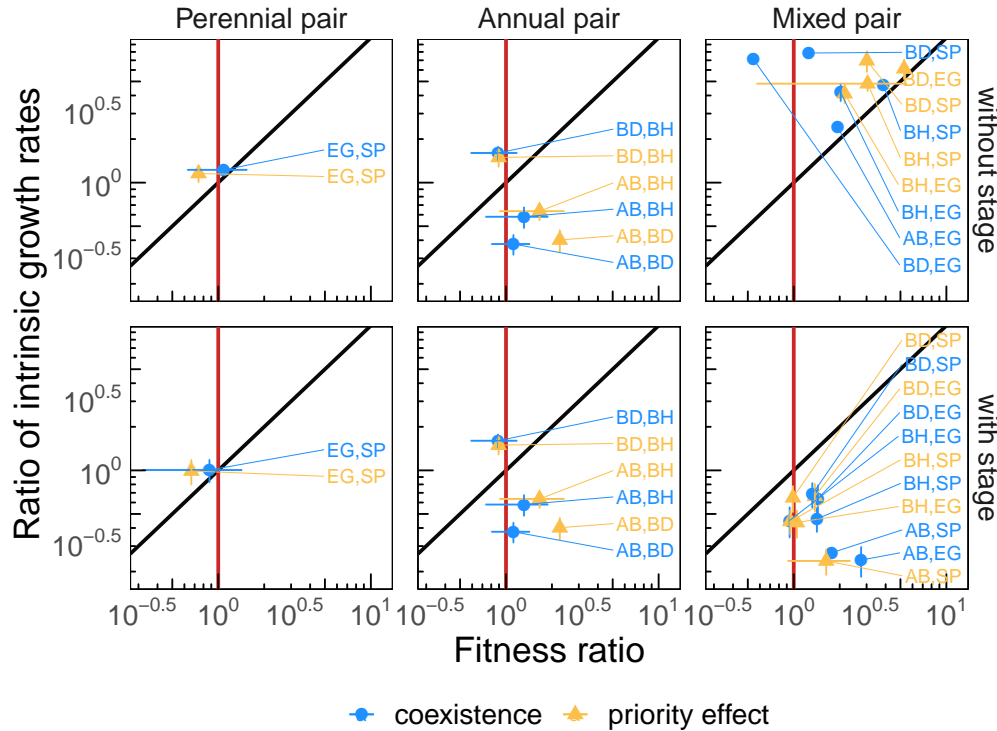

Figure S2: **Community persistence under environmental (parameter) perturbations.** Here we focus on the structural stability (robustness) of coexistence and priority effects to parameter perturbations. As Figure S1 shows, the structural stability in competition strength increases when the system pair is closer to the red line, while the structural stability in intrinsic growth increases when the system pair is closer to the black line. For the perennial pair (EG & SP; left panels), they maximize both the structural stability in competition strength and in intrinsic growth rates, regardless whether the stage dependency is considered. This result is consistent with the fact that they are native species coexisting for a long time. Then for the annual pairs (middle panels), they tend to maximize the structural stability in competition strength instead of that in intrinsic growth rates. Because the annual species do not have stage dependency, the two panels are exactly the same. Then, for the mixed pairs with one annual and one perennial (right panels), they tend to maximize the structural stability in intrinsic growth rates when the stage dependency is not considered (top), while they maximize the structural stability in competition strength when the stage dependency is considered (bottom). Thus, the stage dependency makes the perennials more vulnerable to parameter perturbations in competition strength (while the annuals have been adapted to these kinds of perturbations). The blue dots denote the pairs exhibiting priority effects, while the orange triangles denote the pairs exhibiting priority effects. The error bars represent two standard deviations.

## E Effects of life-history processes

Figure S3 is a remake of Figure 3 in the main text except that all the species pairs are shown individually.

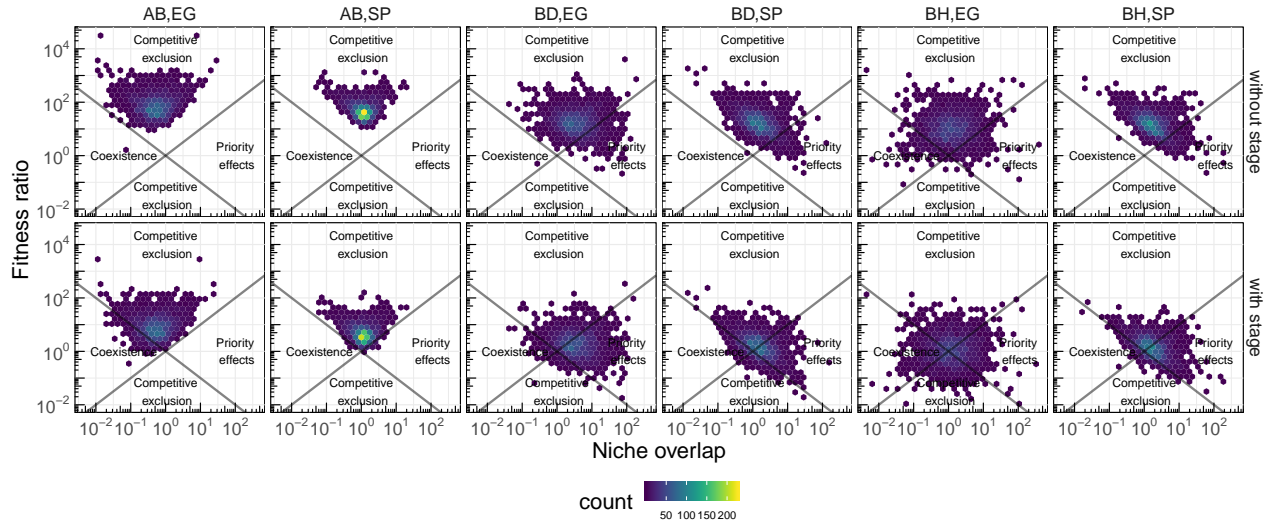

Figure S3: This figure is identical to Figure 3 except species pairs are shown separately.

Figure S4 shows the transition probability of community dynamics for a given ecological community between excluding and incorporating perennial life history processes. Note that there is zero transition probability from coexistence to contingent exclusion. The reason is that changing the effective intrinsic growth rates cannot change the system from coexistence to priority effect, or vice versa (Song *et al.*, 2020a).

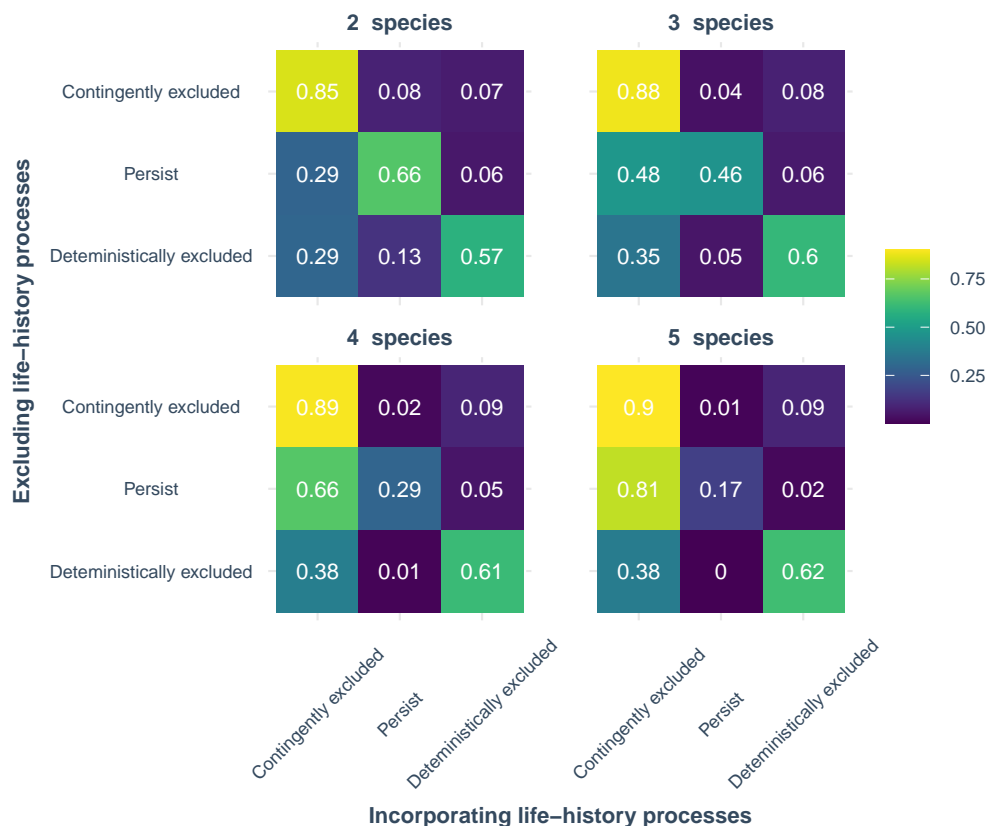

Figure S4: **The frequency and prevalence of contingent exclusion decreases as a function of community size.** We show the transition matrix of community dynamics between excluding (rows) and including (columns) life-history processes as a function of community size. Each element corresponds to the conditional probability (expressed as frequency) of having a particular dynamics by incorporating life-history processes (e.g., contingent exclusion including life-history, first column) given that the system started in a given dynamics excluding life-history processes (deterministic exclusion, third row). The matrices show that the prevalence (starting and remaining) of contingent exclusion (first element) decreases in general with community size. The matrices also show that the incidence (starting from deterministic exclusion—note that coexistence never leads to contingent exclusion) of contingent exclusion also decreases with community size.



## F Effects of community size

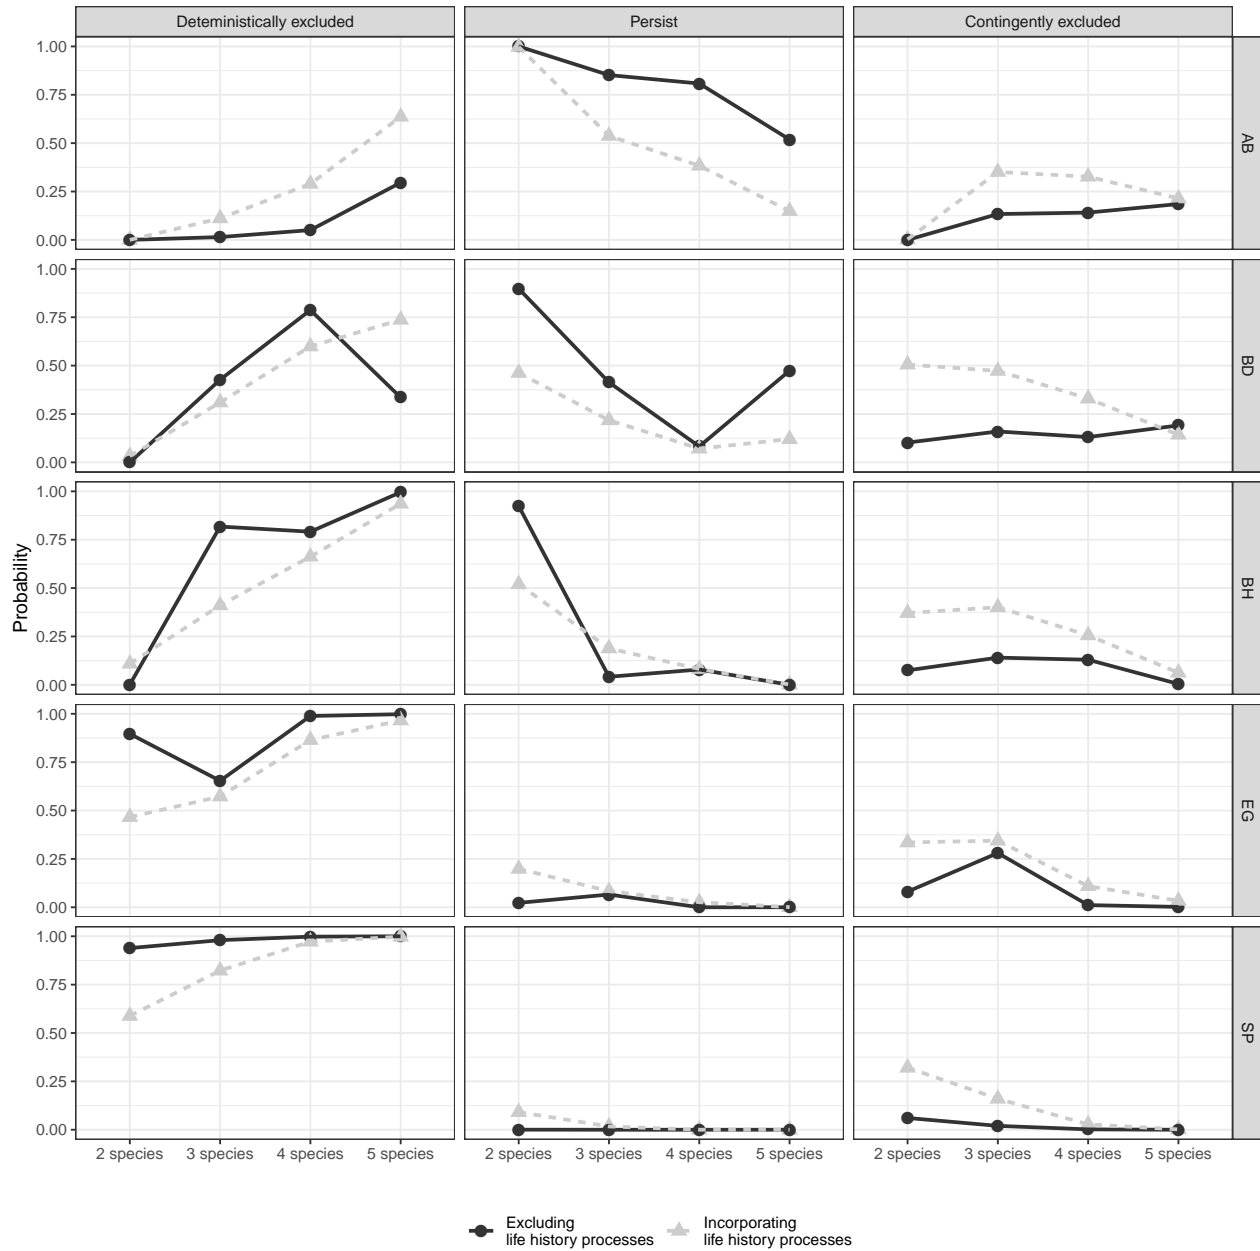

Figure S5: This figure is a remake of Figure 4 in the main text except that the probability is now shown in a scatter plot instead of in a bar plot.

## G Effects of competition structure

Here we perform additional simulations to test the robustness of Figure 5.

We changed the distribution of inter-specific interaction from uniform distribution to half-normal distribution ( $|N(0, 1)|$ ). See Figure S6.

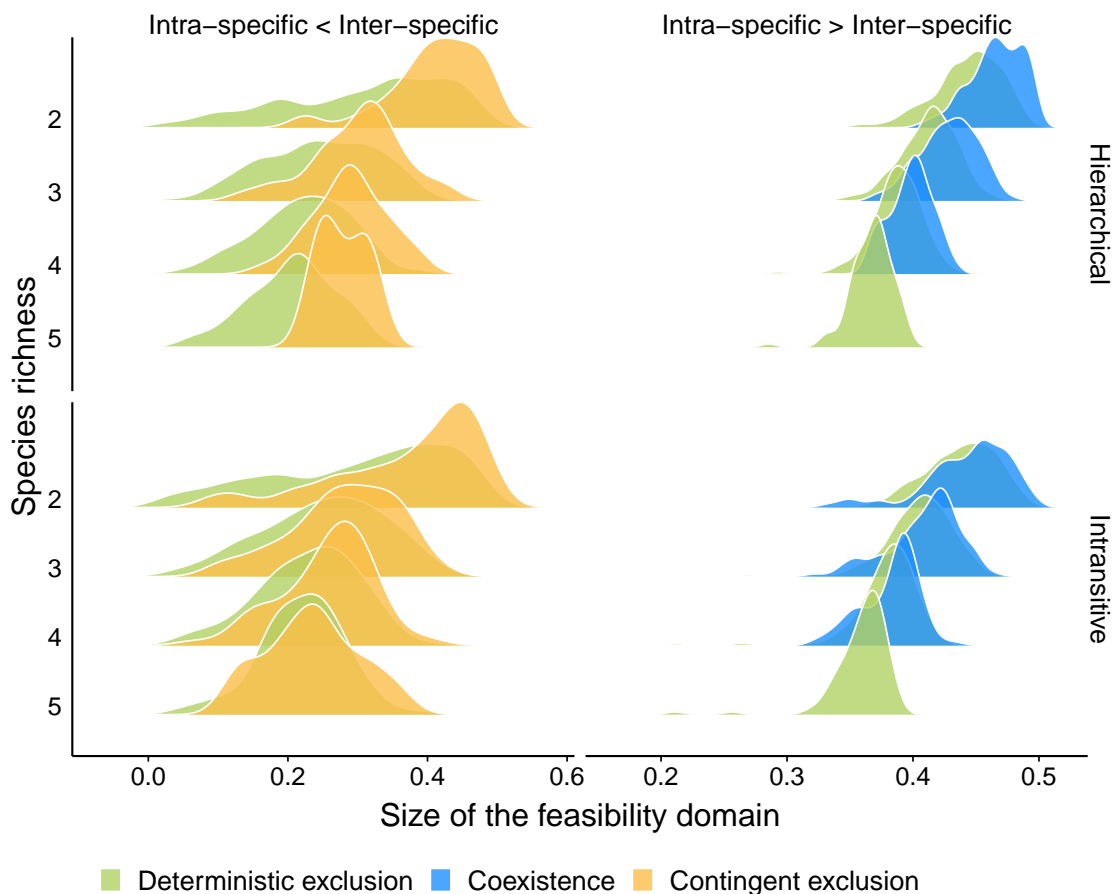

Figure S6: Same as Figure 5 except that the interspecific interactions are drawn from a half-normal distribution. Specifically, this figure shows the theoretical expectations about how competition structure affects the patterns of competitive exclusion. We show model-generated communities with different competition structures. We use two structural combinations: (i) communities with either a low (intraspecific < interspecific) or high (intraspecific > interspecific) intraspecific competition, and (ii) communities with either a hierarchical or intransitive competition structure. We find that the competition structures with weaker intraspecific competition, regardless of being hierarchical or not, produce qualitatively the same patterns as the empirical patterns shown in Panel (B) in Figure 5.
